# Supplementary material for: Electronic structures and bonding of the actinide halides An(TRENTIPS)X (An = Th–Pu; X = F–I): a theoretical perspective
Source: Royal Society of Chemistry journal article supplement (doi:10.1039/d0dt02909b), 2020-01-01
Supplement: d0dt02909b1.pdf [file d0dt02909b1.pdf]

## Electronic Supplementary Information

### Electronic Structures and Bonding of the Actinide Halides

### **An(TRENTIPS)X (An=Th-Pu, X=F-I): A Theoretical Perspective**

Qun-Yan Wu,<sup>a</sup> Cong-Zhi Wang,<sup>a</sup> Jian-Hui Lan,<sup>a</sup>

Zhi-Fang Chai,<sup>a,b</sup> and Wei-Qun Shi\*<sup>a</sup>

<sup>a</sup>Laboratory of Nuclear Energy Chemistry, Institute of High Energy Physics, Chinese Academy of Sciences, Beijing, 100049, China

<sup>b</sup>Engineering Laboratory of Nuclear Energy Materials, Ningbo Institute of Industrial Technology, Chinese Academy of Sciences, Ningbo, Zhejiang, 315201, China

Table S1. Selected bond distances (Å) and angles (degrees) as well as the average relative error of the calculated values to the experimental ones in the four An(TREN<sup>TIPS</sup>)Cl complex using BP86, BLYP, B3LYP and M06L functionals with 6-31+G(d) basis set.

| An(TREN <sup>TIPS</sup> )Cl | Bond parameter | expt.      | BP86   | BLYP   | B3LYP  | M06L   |
|-----------------------------|----------------|------------|--------|--------|--------|--------|
| Th(TREN <sup>TIPS</sup> )Cl | Th-Cl          | 2.693(3)   | 2.704  | 2.722  | 2.712  | 2.736  |
|                             | Th-N1          | 2.309(3)   | 2.327  | 2.354  | 2.335  | 2.314  |
|                             | Th-N2          | 2.305(3)   | 2.325  | 2.351  | 2.333  | 2.327  |
|                             | Th-N3          | 2.284(3)   | 2.318  | 2.343  | 2.333  | 2.303  |
|                             | Th-N4          | 2.668(3)   | 2.721  | 2.730  | 2.716  | 2.767  |
|                             | ∠ClThN4        | 173.50     | 177.15 | 177.00 | 176.85 | 171.55 |
| U(TREN <sup>TIPS</sup> )Cl  | U-Cl           | 2.6383(6)  | 2.637  | 2.663  | 2.651  | 2.671  |
|                             | U-N1           | 2.249(2)   | 2.267  | 2.300  | 2.275  | 2.271  |
|                             | U-N2           | 2.255(2)   | 2.278  | 2.310  | 2.284  | 2.265  |
|                             | U-N3           | 2.231(2)   | 2.262  | 2.290  | 2.268  | 2.248  |
|                             | U-N4           | 2.623(2)   | 2.660  | 2.669  | 2.660  | 2.710  |
|                             | ∠ClUN4         | 173.86     | 174.76 | 175.59 | 175.23 | 169.38 |
| Np(TREN <sup>TIPS</sup> )Cl | Np-Cl          | 2.6200(6)  | 2.632  | 2.660  | 2.641  | 2.661  |
|                             | Np-N1          | 2.2322(19) | 2.264  | 2.297  | 2.268  | 2.252  |
|                             | Np-N2          | 2.2305(19) | 2.276  | 2.307  | 2.264  | 2.272  |
|                             | Np-N3          | 2.2056(19) | 2.255  | 2.287  | 2.256  | 2.247  |
|                             | Np-N4          | 2.605(2)   | 2.636  | 2.651  | 2.660  | 2.681  |
|                             | ∠ClNpN4        | 173.81     | 173.61 | 175.48 | 176.47 | 169.43 |
| Pu(TREN <sup>TIPS</sup> )Cl | Pu-Cl          | 2.6001(5)  | 2.631  | 2.653  | 2.633  | 2.658  |
|                             | Pu-N1          | 2.2311(18) | 2.270  | 2.307  | 2.267  | 2.262  |
|                             | Pu-N2          | 2.2317(17) | 2.286  | 2.327  | 2.266  | 2.297  |
|                             | Pu-N3          | 2.2122(17) | 2.283  | 2.316  | 2.259  | 2.273  |
|                             | Pu-N4          | 2.577(2)   | 2.640  | 2.655  | 2.618  | 2.684  |
|                             | ∠ClPuN4        | 174.35     | 176.44 | 176.27 | 176.98 | 171.90 |
| Average relative error      |                |            | 1.36%  | 2.33%  | 1.47%  | 1.84%  |

Table S2. The electronic energies (a.u.) of each state and the relative electronic energies (RE, kcal/mol) to each ground state for the An(TREN<sup>TIPS</sup>)Cl (An=U, Np, Pu) complexes.

| Complexes                   | Spin state | E            | RE    |
|-----------------------------|------------|--------------|-------|
| U(TREN <sup>TIPS</sup> )Cl  | 1          | -3327.707381 | 32.29 |
|                             | 3          | -3327.758845 | 0.0   |
| Np(TREN <sup>TIPS</sup> )Cl | 2          | -3365.251962 | 16.04 |
|                             | 4          | -3365.277523 | 0.0   |
| Pu(TREN <sup>TIPS</sup> )Cl | 1          | -3404.644651 | 66.61 |
|                             | 3          | -3404.711357 | 24.75 |
|                             | 5          | -3404.750794 | 0.0   |

Table S3. The calculated  $\langle S^2 \rangle$  of the ground state for the An(TREN<sup>TIPS</sup>)X (An=Pa-U, X=F-I) complexes are obtained with the BP86/6-31+G(d)/RECP level of theory.

|                            | -F<br>$\langle S^2 \rangle$ | -Cl<br>$\langle S^2 \rangle$ | -Br<br>$\langle S^2 \rangle$ | -I<br>$\langle S^2 \rangle$ | S(S+1) |
|----------------------------|-----------------------------|------------------------------|------------------------------|-----------------------------|--------|
| Pa(TREN <sup>TIPS</sup> )X | 0.77                        | 0.76                         | 0.78                         | 0.76                        | 0.76   |
| U(TREN <sup>TIPS</sup> )X  | 2.02                        | 2.02                         | 2.02                         | 2.02                        | 2.00   |
| Np(TREN <sup>TIPS</sup> )X | 3.80                        | 3.81                         | 3.81                         | 3.82                        | 3.75   |
| Pu(TREN <sup>TIPS</sup> )X | 6.18                        | 6.21                         | 6.22                         | 6.27                        | 6.25   |

Table S4. Natural charge on the An ( $Q_{An}$ ) and X ( $Q_X$ ) atoms as well as population of valence electron of An and X atoms at the BP86/ECP-SEG/6-31+G(d) level of theory.

| An(TREN <sup>TIPS</sup> )X  | $Q_{An}$ | $Q_X$  | An   |      |      |      | X    |      |
|-----------------------------|----------|--------|------|------|------|------|------|------|
|                             |          |        | 7s   | 5f   | 6d   | 7p   | ns   | np   |
| Th(TREN <sup>TIPS</sup> )F  | 1.839    | -0.623 | 0.11 | 0.16 | 1.05 | 0.24 | 1.90 | 5.72 |
| Pa(TREN <sup>TIPS</sup> )F  | 1.728    | -0.568 | 0.31 | 1.52 | 1.08 | 0.24 | 1.89 | 5.67 |
| U(TREN <sup>TIPS</sup> )F   | 1.606    | -0.548 | 0.12 | 2.85 | 1.10 | 0.25 | 1.89 | 5.65 |
| Np(TREN <sup>TIPS</sup> )F  | 1.589    | -0.572 | 0.12 | 3.97 | 1.02 | 0.25 | 1.90 | 5.66 |
| Pu(TREN <sup>TIPS</sup> )F  | 1.580    | -0.597 | 0.12 | 5.05 | 0.96 | 0.24 | 1.91 | 5.68 |
| Th(TREN <sup>TIPS</sup> )Cl | 1.439    | -0.329 | 0.13 | 0.17 | 1.25 | 0.29 | 1.80 | 5.52 |
| Pa(TREN <sup>TIPS</sup> )Cl | 1.414    | -0.317 | 0.17 | 1.63 | 1.29 | 0.29 | 1.81 | 5.50 |
| U(TREN <sup>TIPS</sup> )Cl  | 1.302    | -0.338 | 0.13 | 2.90 | 1.27 | 0.30 | 1.83 | 5.50 |
| Np(TREN <sup>TIPS</sup> )Cl | 1.270    | -0.372 | 0.14 | 4.04 | 1.19 | 0.29 | 1.83 | 5.53 |
| Pu(TREN <sup>TIPS</sup> )Cl | 1.324    | -0.416 | 0.14 | 5.08 | 1.12 | 0.29 | 1.85 | 5.56 |
| Th(TREN <sup>TIPS</sup> )Br | 1.331    | -0.246 | 0.14 | 0.17 | 1.29 | 0.31 | 1.78 | 5.46 |
| Pa(TREN <sup>TIPS</sup> )Br | 1.254    | -0.246 | 0.38 | 1.49 | 1.32 | 0.31 | 1.80 | 5.44 |
| U(TREN <sup>TIPS</sup> )Br  | 1.246    | -0.288 | 0.14 | 2.90 | 1.31 | 0.32 | 1.82 | 5.46 |
| Np(TREN <sup>TIPS</sup> )Br | 1.201    | -0.317 | 0.15 | 4.04 | 1.23 | 0.32 | 1.82 | 5.49 |
| Pu(TREN <sup>TIPS</sup> )Br | 1.267    | -0.363 | 0.15 | 5.07 | 1.15 | 0.31 | 1.83 | 5.52 |
| Th(TREN <sup>TIPS</sup> )I  | 1.250    | -0.164 | 0.15 | 0.16 | 1.32 | 0.34 | 1.77 | 5.39 |
| Pa(TREN <sup>TIPS</sup> )I  | 1.265    | -0.209 | 0.27 | 1.52 | 1.35 | 0.35 | 1.80 | 5.41 |
| U(TREN <sup>TIPS</sup> )I   | 1.205    | -0.250 | 0.16 | 2.88 | 1.32 | 0.35 | 1.81 | 5.43 |
| Np(TREN <sup>TIPS</sup> )I  | 1.144    | -0.265 | 0.17 | 4.04 | 1.24 | 0.35 | 1.81 | 5.45 |
| Pu(TREN <sup>TIPS</sup> )I  | 1.127    | -0.280 | 0.18 | 5.14 | 1.16 | 0.35 | 1.82 | 5.46 |

Table S5. The composition and contribution of An and X atomic orbitals (AOs) to An-X bonds for the actinide halides An(TREN<sup>TIPS</sup>)X.

|       | An%   | X%    | Contribution of An AOs (%)           | Contribution of X AOs(%) |
|-------|-------|-------|--------------------------------------|--------------------------|
| Th-Cl | 11.22 | 88.78 | 7s(5.97)7p(11.80)6d(42.02)5f(40.19)  | 3s(75.92)3p(24.05)       |
| Pa-Cl | 12.54 | 87.46 | 7s(6.96)7p(7.77)6d(48.68)5f(36.57)   | 3s(63.46)3p(36.50)       |
| U-Cl  | 13.10 | 86.90 | 7s(5.56)7p(6.07)6d(52.69)5f(35.67)   | 3s(51.49)3p(48.47)       |
| Np-Cl | 12.97 | 87.03 | 7s(6.42)7p(5.69)6d(55.03)5f(32.84)   | 3s(47.65)3p(52.31)       |
| Pu-Cl | 12.61 | 87.39 | 7s(4.53)7p(2.83)6d(61.20)5f(31.44)   | 3s(39.05)3p(60.91)       |
| Th-Br | 12.88 | 87.12 | 7s(6.70)7p(13.88)6d(40.89)5f(38.51)  | 4s(69.43)4p(30.52)       |
| Pa-Br | 14.59 | 85.41 | 7s(24.86)7p(8.66)6d(48.21)5f(18.25)  | 4s(59.10)4p(40.83)       |
| U-Br  | 14.28 | 85.72 | 7s(6.58)7p(8.80)6d(51.82)5f(32.80)   | 4s(48.60)4p(51.31)       |
| Np-Br | 14.27 | 85.73 | 7s(7.40)7p(8.79)6d(54.19)5f(29.62)   | 4s(45.99)4p(53.96)       |
| Pu-Br | 14.05 | 85.95 | 7s(5.19)7p(5.07)6d(61.26)5f(28.48)   | 4s(38.92)4p(61.00)       |
| Th-I  | 15.47 | 84.53 | 7s(9.06)7p(13.71)6d(54.10)5f(23.12)  | 5s(48.81)5p(51.19)       |
| Pa-I  | 16.45 | 83.55 | 7s(14.31)7p(12.63)6d(52.36)5f(20.69) | 5s(49.71)5p(50.29)       |
| U-I   | 16.49 | 83.51 | 7s(8.56)7p(13.86)6d(48.93)5f(28.65)  | 5s(40.61)5p(59.39)       |
| Np-I  | 16.73 | 83.27 | 7s(9.42)7p(14.50)6d(50.38)5f(25.69)  | 5s(38.88)5p(61.12)       |
| Pu-I  | 16.95 | 83.05 | 7s(9.86)7p(12.95)6d(51.20)5f(25.98)  | 5s(33.55)5p(66.45)       |

Table S6. Change of the Gibbs free energy ( $\Delta G$ , kcal/mol) for the reactions  $An^{IV}(TREN^{TIPS})X \rightarrow An^{III}(TREN^{TIPS}) + 0.5X_2$  (An=Th-Pu, X=F-I) at the BP86/ECP/6-31+G(d) level of theory.

| Reaction                                                           | X=F    | X=Cl  | X=Br  | X=I   |
|--------------------------------------------------------------------|--------|-------|-------|-------|
| $Th^{IV}(TREN^{TIPS})X \rightarrow Th^{III}(TREN^{TIPS}) + 0.5X_2$ | 139.99 | 92.85 | 88.25 | 74.72 |
| $Pa^{IV}(TREN^{TIPS})X \rightarrow Pa^{III}(TREN^{TIPS}) + 0.5X_2$ | 125.32 | 85.47 | 72.46 | 67.13 |
| $U^{IV}(TREN^{TIPS})X \rightarrow U^{III}(TREN^{TIPS}) + 0.5X_2$   | 118.46 | 71.15 | 66.49 | 53.41 |
| $Np^{IV}(TREN^{TIPS})X \rightarrow Np^{III}(TREN^{TIPS}) + 0.5X_2$ | 97.29  | 53.19 | 49.20 | 36.44 |
| $Pu^{IV}(TREN^{TIPS})X \rightarrow Pu^{III}(TREN^{TIPS}) + 0.5X_2$ | 85.15  | 39.05 | 33.07 | 22.47 |

The optimized Cartesian coordinates of the An(TREN<sup>TIPS</sup>)X (An=Th-Pu, X=F-Br) complexes at the BP86/ECP/6-31+G(d) level of theory as following:

117

Th(TREN<sup>TIPS</sup>)F

|    |             |             |            |
|----|-------------|-------------|------------|
| Th | 11.50345500 | 9.72229500  | 4.85304200 |
| F  | 10.87930500 | 11.79023100 | 4.78044400 |
| Si | 15.10582500 | 10.73115300 | 4.69117300 |
| Si | 10.12759700 | 9.64601300  | 8.30195600 |
| Si | 9.48497800  | 8.91050200  | 1.84842700 |
| N  | 13.80344700 | 9.54665700  | 4.45687100 |
| N  | 11.14185500 | 8.93441400  | 7.02187600 |
| N  | 10.33684400 | 8.38504700  | 3.31891500 |
| C  | 16.36982800 | 10.22279600 | 6.08128300 |
| H  | 16.97660800 | 11.14338700 | 6.22725000 |
| C  | 15.68797200 | 9.90572000  | 7.42943000 |
| H  | 14.99990600 | 10.70557300 | 7.75831000 |
| H  | 16.43634400 | 9.76091300  | 8.23502200 |
| H  | 15.09406300 | 8.97413400  | 7.36483900 |
| C  | 17.36141900 | 9.09250000  | 5.71969100 |
| H  | 16.84807100 | 8.11836400  | 5.60885000 |
| H  | 18.11705100 | 8.96229400  | 6.52138500 |
| H  | 17.91190600 | 9.28958700  | 4.78186500 |
| C  | 16.15765300 | 10.89481700 | 3.07000500 |
| H  | 16.68523800 | 9.91819700  | 2.99891300 |
| C  | 17.25184500 | 11.98441900 | 3.15725100 |
| H  | 16.81329300 | 12.99885200 | 3.20838200 |
| H  | 17.90733800 | 11.96141600 | 2.26290800 |
| H  | 17.90101000 | 11.85879000 | 4.04353600 |
| C  | 15.33314900 | 11.04082800 | 1.77228500 |
| H  | 14.55507700 | 10.26041300 | 1.69012700 |
| H  | 15.98607000 | 10.95972000 | 0.87929200 |
| H  | 14.82594700 | 12.02066700 | 1.71616700 |
| C  | 14.27021800 | 12.38954500 | 5.23892700 |
| H  | 13.40247500 | 12.09140200 | 5.87177500 |
| C  | 15.16479200 | 13.29515400 | 6.12030200 |
| H  | 15.48845600 | 12.80348000 | 7.05407700 |
| H  | 14.61661600 | 14.21502200 | 6.40612800 |
| H  | 16.07475400 | 13.61538600 | 5.57862000 |
| C  | 13.70833600 | 13.22429800 | 4.06293900 |

|   |             |             |             |
|---|-------------|-------------|-------------|
| H | 14.52997100 | 13.64705900 | 3.45537600  |
| H | 13.10433500 | 14.07170800 | 4.44149000  |
| H | 13.05815600 | 12.64044500 | 3.39019000  |
| C | 14.24942600 | 8.21881600  | 3.96296200  |
| H | 15.35170800 | 8.13977300  | 3.86046700  |
| H | 13.85287700 | 8.01874200  | 2.94260200  |
| C | 13.78688100 | 7.10670100  | 4.91582100  |
| H | 14.13565500 | 6.10147100  | 4.58513300  |
| H | 14.21491500 | 7.30220600  | 5.91456500  |
| C | 9.02808500  | 8.25551600  | 9.09253600  |
| H | 9.76446400  | 7.55192100  | 9.53996600  |
| C | 8.12938600  | 8.74404400  | 10.25224300 |
| H | 8.69632300  | 9.29557200  | 11.02427400 |
| H | 7.63278700  | 7.88900600  | 10.75436800 |
| H | 7.32738000  | 9.41200400  | 9.88688100  |
| C | 8.19837200  | 7.44535800  | 8.07205400  |
| H | 7.36614100  | 8.04559700  | 7.66043500  |
| H | 7.74886100  | 6.54873100  | 8.54522100  |
| H | 8.81061300  | 7.10581900  | 7.21692000  |
| C | 9.13746300  | 11.09458800 | 7.49326000  |
| H | 9.91189600  | 11.71074600 | 6.98842400  |
| C | 8.43121100  | 12.02703300 | 8.50623000  |
| H | 7.63777300  | 11.50003600 | 9.06802600  |
| H | 7.94860500  | 12.87419600 | 7.97883200  |
| H | 9.13032500  | 12.45895100 | 9.24475800  |
| C | 8.13382000  | 10.65694800 | 6.40371100  |
| H | 8.55893900  | 9.93900200  | 5.67389400  |
| H | 7.77192200  | 11.52938000 | 5.82579700  |
| H | 7.24912700  | 10.16066400 | 6.84447200  |
| C | 11.17211500 | 10.42111000 | 9.73734500  |
| H | 10.42626400 | 10.89272500 | 10.41382900 |
| C | 11.96505100 | 9.39777100  | 10.58224700 |
| H | 11.31809400 | 8.60469400  | 11.00154600 |
| H | 12.46772900 | 9.89593600  | 11.43622600 |
| H | 12.75666800 | 8.90503900  | 9.98717700  |
| C | 12.10958200 | 11.53632500 | 9.22652300  |
| H | 12.85651000 | 11.12931600 | 8.51844100  |
| H | 12.66957500 | 12.00442100 | 10.06133200 |
| H | 11.56248500 | 12.34194500 | 8.70332100  |
| C | 11.91615200 | 7.73440000  | 7.42589200  |
| H | 11.55427100 | 7.28830200  | 8.37603600  |

|   |             |             |             |
|---|-------------|-------------|-------------|
| H | 12.98228900 | 7.99111900  | 7.61186400  |
| C | 11.83705300 | 6.62876100  | 6.36361100  |
| H | 12.42221200 | 5.73038100  | 6.66710900  |
| H | 10.78153900 | 6.32215200  | 6.25671000  |
| C | 7.57989200  | 8.55232100  | 1.89934700  |
| H | 7.18176300  | 9.06073100  | 0.99400400  |
| C | 6.89536000  | 9.19088900  | 3.12711600  |
| H | 7.24068100  | 8.71611500  | 4.06441900  |
| H | 5.79446600  | 9.06497300  | 3.08124900  |
| H | 7.09992200  | 10.27406400 | 3.21273300  |
| C | 7.17959600  | 7.06251700  | 1.78830000  |
| H | 7.61627700  | 6.56824900  | 0.90079400  |
| H | 6.07809700  | 6.95768900  | 1.71232100  |
| H | 7.49398600  | 6.48983400  | 2.68098700  |
| C | 10.17410800 | 7.95226100  | 0.30843400  |
| H | 9.89260400  | 6.89458000  | 0.50805100  |
| C | 11.71081300 | 7.98104100  | 0.15582600  |
| H | 12.07109700 | 8.97986600  | -0.15076100 |
| H | 12.04630000 | 7.26271100  | -0.61961400 |
| H | 12.22531500 | 7.72340200  | 1.09930700  |
| C | 9.49561500  | 8.34612700  | -1.02497400 |
| H | 8.39271700  | 8.28996200  | -0.97529900 |
| H | 9.82274400  | 7.67811700  | -1.84759500 |
| H | 9.76309300  | 9.37724600  | -1.32397700 |
| C | 9.70637800  | 10.82852600 | 1.75099000  |
| H | 9.48162100  | 11.19568000 | 2.77623800  |
| C | 11.14357900 | 11.28807400 | 1.41014100  |
| H | 11.93082200 | 10.77983100 | 2.00410000  |
| H | 11.26027000 | 12.37555100 | 1.58148600  |
| H | 11.38475700 | 11.09200300 | 0.34870300  |
| C | 8.70622700  | 11.54237100 | 0.80926500  |
| H | 8.85213100  | 11.24394100 | -0.24558300 |
| H | 8.84631200  | 12.64073600 | 0.85920400  |
| H | 7.65394100  | 11.33421700 | 1.07195400  |
| C | 10.27448200 | 6.92834900  | 3.59168400  |
| H | 9.89259300  | 6.34072800  | 2.72980800  |
| H | 9.57139100  | 6.70713400  | 4.42563600  |
| C | 11.66442700 | 6.36738700  | 3.92103200  |
| H | 11.62113900 | 5.28116000  | 4.16555000  |
| H | 12.30409300 | 6.48369900  | 3.02925300  |
| N | 12.30034600 | 7.12260200  | 5.03689300  |



117

Th(TREN<sup>TIPS</sup>)Cl

|    |             |             |            |
|----|-------------|-------------|------------|
| Th | 11.49426400 | 9.77021500  | 4.88494600 |
| Cl | 10.57662800 | 12.31420900 | 4.90172700 |
| Si | 15.11335900 | 10.79034400 | 4.75051200 |
| Si | 10.01920200 | 9.41243100  | 8.27563200 |
| Si | 9.55216000  | 9.14778500  | 1.77504400 |
| N  | 13.77661200 | 9.64135100  | 4.45016600 |
| N  | 11.07120000 | 8.80799800  | 6.95846000 |
| N  | 10.35731100 | 8.56721800  | 3.26182100 |
| C  | 16.22262100 | 10.23950100 | 6.24741900 |
| H  | 16.89236200 | 11.10868800 | 6.42845500 |
| C  | 15.40159800 | 10.01582700 | 7.53452100 |
| H  | 14.78090600 | 10.88972400 | 7.80378900 |
| H  | 16.05937800 | 9.79803400  | 8.40039700 |
| H  | 14.71608500 | 9.15489900  | 7.41884600 |
| C  | 17.13342000 | 9.01815100  | 5.98573800 |
| H  | 16.54470300 | 8.09761800  | 5.80823900 |
| H  | 17.78116700 | 8.81629100  | 6.86317500 |
| H  | 17.79885200 | 9.16191400  | 5.11521900 |
| C  | 16.29970400 | 10.85156100 | 3.21794300 |
| H  | 16.79046600 | 9.85375400  | 3.21596000 |
| C  | 17.43305400 | 11.89366000 | 3.37899200 |
| H  | 17.04222700 | 12.92812200 | 3.35860600 |
| H  | 18.16518500 | 11.81011500 | 2.55021800 |
| H  | 17.99318500 | 11.76867900 | 4.32425800 |
| C  | 15.60755900 | 11.00388100 | 1.84542200 |
| H  | 14.81424800 | 10.25018700 | 1.69376200 |
| H  | 16.34154200 | 10.88738200 | 1.02208400 |
| H  | 15.14192400 | 11.99861700 | 1.72829200 |
| C  | 14.33229600 | 12.50507300 | 5.18189200 |
| H  | 13.39520000 | 12.28512000 | 5.74284700 |
| C  | 15.20404600 | 13.38592500 | 6.10949600 |
| H  | 15.42622600 | 12.90144200 | 7.07606200 |
| H  | 14.68530500 | 14.33980800 | 6.33026400 |
| H  | 16.16982500 | 13.64334800 | 5.63553700 |
| C  | 13.91783400 | 13.32550600 | 3.93731100 |
| H  | 14.80710500 | 13.69364200 | 3.39149300 |
| H  | 13.32171100 | 14.20897400 | 4.23654100 |

|   |             |             |             |
|---|-------------|-------------|-------------|
| H | 13.30249500 | 12.74603300 | 3.22856200  |
| C | 14.20788100 | 8.34771300  | 3.85235500  |
| H | 15.30728200 | 8.28068100  | 3.72062600  |
| H | 13.78560400 | 8.22159800  | 2.83069000  |
| C | 13.77444500 | 7.16661600  | 4.72953800  |
| H | 14.11181500 | 6.19198500  | 4.30956300  |
| H | 14.23471600 | 7.28193100  | 5.72662900  |
| C | 9.41490300  | 7.94713000  | 9.39921400  |
| H | 10.33935800 | 7.58812200  | 9.90170400  |
| C | 8.47071300  | 8.43303200  | 10.52565100 |
| H | 8.90000500  | 9.27046000  | 11.10496800 |
| H | 8.25563900  | 7.61252200  | 11.23987400 |
| H | 7.49859500  | 8.77149600  | 10.12152400 |
| C | 8.79650800  | 6.73013600  | 8.67439200  |
| H | 7.81034100  | 6.97072500  | 8.23941400  |
| H | 8.64359100  | 5.88946600  | 9.38153200  |
| H | 9.43236000  | 6.35869500  | 7.85100200  |
| C | 8.55846300  | 10.38155000 | 7.46564200  |
| H | 8.99739800  | 10.93023100 | 6.60327100  |
| C | 7.93256700  | 11.46302000 | 8.37960700  |
| H | 7.47276400  | 11.02276100 | 9.28447300  |
| H | 7.13228600  | 12.00678000 | 7.83912000  |
| H | 8.67031400  | 12.21460400 | 8.71040300  |
| C | 7.44740200  | 9.45992600  | 6.90965600  |
| H | 7.84339300  | 8.66670600  | 6.24881100  |
| H | 6.70926500  | 10.04402600 | 6.32587700  |
| H | 6.89187800  | 8.96400600  | 7.72747800  |
| C | 10.99796500 | 10.61535500 | 9.43347700  |
| H | 10.25012800 | 11.05701300 | 10.12758400 |
| C | 12.07286500 | 9.91212000  | 10.29362200 |
| H | 11.64650400 | 9.13728500  | 10.95672500 |
| H | 12.60041400 | 10.64258700 | 10.94027100 |
| H | 12.84223800 | 9.42820400  | 9.66215900  |
| C | 11.63241100 | 11.77463700 | 8.63483800  |
| H | 12.39207300 | 11.39461200 | 7.92234700  |
| H | 12.15214900 | 12.48768200 | 9.30668900  |
| H | 10.89511600 | 12.34764800 | 8.04483300  |
| C | 11.94143300 | 7.65791400  | 7.31442100  |
| H | 11.64179100 | 7.17193800  | 8.26444600  |
| H | 12.99538000 | 7.97706600  | 7.47048400  |
| C | 11.89228900 | 6.58881500  | 6.21749400  |

|   |             |             |             |
|---|-------------|-------------|-------------|
| H | 12.53151800 | 5.71118100  | 6.46451900  |
| H | 10.85185200 | 6.23201500  | 6.12408100  |
| C | 7.63658400  | 9.26413300  | 2.00816800  |
| H | 7.23265300  | 9.60612500  | 1.03054700  |
| C | 7.24363100  | 10.31595200 | 3.06752400  |
| H | 7.68737000  | 10.07672400 | 4.05210700  |
| H | 6.14358400  | 10.35011600 | 3.20479600  |
| H | 7.57465900  | 11.33479400 | 2.79803700  |
| C | 6.97510200  | 7.90444900  | 2.33183300  |
| H | 7.19650100  | 7.13005600  | 1.57324600  |
| H | 5.87213100  | 8.00429100  | 2.38675600  |
| H | 7.31213500  | 7.51850100  | 3.31247600  |
| C | 9.87225000  | 7.89955900  | 0.32010600  |
| H | 9.55701000  | 6.91459900  | 0.72823500  |
| C | 11.35462700 | 7.75987100  | -0.09269500 |
| H | 11.70710400 | 8.65756000  | -0.63326100 |
| H | 11.49890300 | 6.89613100  | -0.77299600 |
| H | 12.02237400 | 7.61698900  | 0.77687500  |
| C | 8.99040100  | 8.14974300  | -0.92619000 |
| H | 7.91358000  | 8.17732000  | -0.68107700 |
| H | 9.13774300  | 7.34723500  | -1.67725900 |
| H | 9.24310300  | 9.10518400  | -1.42141900 |
| C | 10.19245100 | 10.93467200 | 1.44410900  |
| H | 9.91845700  | 11.49699200 | 2.36251700  |
| C | 11.72172900 | 11.06701400 | 1.27620200  |
| H | 12.30221300 | 10.57355100 | 2.08252100  |
| H | 12.02465800 | 12.13224600 | 1.26660700  |
| H | 12.06861500 | 10.61843200 | 0.32767500  |
| C | 9.47659000  | 11.63746000 | 0.26560200  |
| H | 9.74557400  | 11.17915600 | -0.70449900 |
| H | 9.77194200  | 12.70420800 | 0.21358400  |
| H | 8.37576800  | 11.60566100 | 0.35560300  |
| C | 10.21752500 | 7.11702100  | 3.55732300  |
| H | 9.71654800  | 6.55431400  | 2.74381900  |
| H | 9.58678100  | 6.94972100  | 4.45821900  |
| C | 11.59832000 | 6.48609900  | 3.77675200  |
| H | 11.53300400 | 5.39134000  | 3.96946700  |
| H | 12.19860300 | 6.63365100  | 2.86251100  |
| N | 12.29389700 | 7.16921100  | 4.90492600  |

117

Th(TREN<sup>TIPS</sup>)Br

|    |             |             |            |
|----|-------------|-------------|------------|
| Th | 11.48527700 | 9.77611300  | 4.88622600 |
| Br | 10.49359300 | 12.47240700 | 4.87871400 |
| Si | 15.10505200 | 10.80664500 | 4.74639700 |
| Si | 10.01667700 | 9.41541500  | 8.28011600 |
| Si | 9.55627500  | 9.13027900  | 1.77369700 |
| N  | 13.76433100 | 9.65856500  | 4.44728300 |
| N  | 11.07535300 | 8.82057000  | 6.96219800 |
| N  | 10.35480700 | 8.56444800  | 3.27188200 |
| C  | 16.21030400 | 10.25664900 | 6.24638100 |
| H  | 16.88139400 | 11.12536200 | 6.42449500 |
| C  | 15.38793600 | 10.04018500 | 7.53377600 |
| H  | 14.76399200 | 10.91396600 | 7.79586400 |
| H  | 16.04499600 | 9.83056100  | 8.40220400 |
| H  | 14.70565600 | 9.17614100  | 7.42338600 |
| C  | 17.11954500 | 9.03291500  | 5.99068200 |
| H  | 16.53001300 | 8.11264600  | 5.81444200 |
| H  | 17.76470200 | 8.83273700  | 6.87039300 |
| H  | 17.78742400 | 9.17295500  | 5.12144600 |
| C  | 16.29468900 | 10.85552700 | 3.21567900 |
| H  | 16.78162100 | 9.85592300  | 3.21849200 |
| C  | 17.43235800 | 11.89310200 | 3.37625300 |
| H  | 17.04658400 | 12.92929400 | 3.35169900 |
| H  | 18.16603700 | 11.80332700 | 2.54952100 |
| H  | 17.98962300 | 11.76846600 | 4.32324200 |
| C  | 15.60677700 | 11.00597700 | 1.84084300 |
| H  | 14.81106200 | 10.25476600 | 1.68948200 |
| H  | 16.34252900 | 10.88402500 | 1.01989100 |
| H  | 15.14507800 | 12.00195500 | 1.71948700 |
| C  | 14.33545100 | 12.52807700 | 5.17008800 |
| H  | 13.39128600 | 12.31882300 | 5.72356100 |
| C  | 15.20828300 | 13.40200800 | 6.10330200 |
| H  | 15.41459900 | 12.91875400 | 7.07398200 |
| H  | 14.69796700 | 14.36244200 | 6.31494800 |
| H  | 16.18185300 | 13.64678500 | 5.63865300 |
| C  | 13.93861000 | 13.35042500 | 3.92111700 |
| H  | 14.83501700 | 13.70617600 | 3.37890500 |
| H  | 13.35199600 | 14.24194400 | 4.21528300 |
| H  | 13.31813600 | 12.77723100 | 3.21176800 |
| C  | 14.19797200 | 8.36551500  | 3.84857500 |

|   |             |             |             |
|---|-------------|-------------|-------------|
| H | 15.29676700 | 8.30357600  | 3.71087300  |
| H | 13.77035700 | 8.23618700  | 2.82964700  |
| C | 13.77551100 | 7.18380700  | 4.72978400  |
| H | 14.11518500 | 6.21030600  | 4.30934700  |
| H | 14.24082000 | 7.30287100  | 5.72401800  |
| C | 9.43244100  | 7.94690600  | 9.41036800  |
| H | 10.36050700 | 7.60071100  | 9.91531800  |
| C | 8.48198100  | 8.42910100  | 10.53314800 |
| H | 8.89962500  | 9.27718000  | 11.10533700 |
| H | 8.27793700  | 7.61167500  | 11.25405100 |
| H | 7.50562500  | 8.75092900  | 10.12578400 |
| C | 8.82732800  | 6.71876500  | 8.69321200  |
| H | 7.83924000  | 6.94574000  | 8.25517100  |
| H | 8.68212300  | 5.88165000  | 9.40617000  |
| H | 9.46816800  | 6.34774000  | 7.87356400  |
| C | 8.54221000  | 10.35923300 | 7.46727800  |
| H | 8.97645300  | 10.91559300 | 6.60713800  |
| C | 7.89690800  | 11.43133400 | 8.37807800  |
| H | 7.43589800  | 10.98436200 | 9.27907500  |
| H | 7.09432600  | 11.96669400 | 7.83274500  |
| H | 8.62390900  | 12.19070500 | 8.71498800  |
| C | 7.44972900  | 9.42014500  | 6.90444600  |
| H | 7.86346300  | 8.63368500  | 6.24609500  |
| H | 6.70673700  | 9.99234200  | 6.31510000  |
| H | 6.89656700  | 8.91509100  | 7.71830900  |
| C | 10.98496800 | 10.63171800 | 9.43352500  |
| H | 10.23380800 | 11.06409300 | 10.12993900 |
| C | 12.06926000 | 9.93994100  | 10.29126000 |
| H | 11.65381400 | 9.15587500  | 10.95031000 |
| H | 12.58511500 | 10.67527900 | 10.94176700 |
| H | 12.84666000 | 9.47066700  | 9.65859100  |
| C | 11.60459300 | 11.79942900 | 8.63613100  |
| H | 12.35741600 | 11.42985200 | 7.91074600  |
| H | 12.12876800 | 12.50955400 | 9.30771700  |
| H | 10.85785500 | 12.37350500 | 8.05958200  |
| C | 11.95489100 | 7.67842000  | 7.32132500  |
| H | 11.66399500 | 7.19725800  | 8.27643200  |
| H | 13.00739500 | 8.00557400  | 7.46847300  |
| C | 11.90599200 | 6.60272900  | 6.23138500  |
| H | 12.55259100 | 5.73078500  | 6.47890600  |
| H | 10.86750300 | 6.23849900  | 6.14595400  |

|   |             |             |             |
|---|-------------|-------------|-------------|
| C | 7.64149100  | 9.25116400  | 2.00511100  |
| H | 7.23848100  | 9.57636700  | 1.02137500  |
| C | 7.24759800  | 10.32132600 | 3.04574500  |
| H | 7.69600400  | 10.10471300 | 4.03346500  |
| H | 6.14777700  | 10.35269100 | 3.18541100  |
| H | 7.57333000  | 11.33612600 | 2.75574400  |
| C | 6.98090600  | 7.89656300  | 2.35082300  |
| H | 7.20604200  | 7.10926400  | 1.60661200  |
| H | 5.87763600  | 7.99551800  | 2.40048500  |
| H | 7.31541200  | 7.52850800  | 3.33918600  |
| C | 9.88273700  | 7.86694400  | 0.33334400  |
| H | 9.59265000  | 6.88061700  | 0.75646200  |
| C | 11.36337000 | 7.75429600  | -0.09443400 |
| H | 11.69039900 | 8.65372200  | -0.64811800 |
| H | 11.51837100 | 6.88685100  | -0.76763300 |
| H | 12.04406600 | 7.63451000  | 0.76872700  |
| C | 8.98293000  | 8.08307000  | -0.90661000 |
| H | 7.90814200  | 8.08754600  | -0.65149500 |
| H | 9.14226600  | 7.27583800  | -1.65016200 |
| H | 9.20745500  | 9.03859400  | -1.41528100 |
| C | 10.19694800 | 10.91129800 | 1.42053600  |
| H | 9.90080800  | 11.48883200 | 2.32240600  |
| C | 11.72800300 | 11.05299500 | 1.28256100  |
| H | 12.29661000 | 10.57754700 | 2.10800500  |
| H | 12.02255200 | 12.12037800 | 1.26306000  |
| H | 12.09864600 | 10.59212500 | 0.34904900  |
| C | 9.50037300  | 11.58622400 | 0.21444600  |
| H | 9.79069000  | 11.11176600 | -0.74177200 |
| H | 9.79008600  | 12.65370700 | 0.14794200  |
| H | 8.39821100  | 11.54909200 | 0.28426600  |
| C | 10.21343900 | 7.11703900  | 3.58113100  |
| H | 9.70262100  | 6.54815800  | 2.77834800  |
| H | 9.59147900  | 6.95963400  | 4.48983200  |
| C | 11.59597000 | 6.48791400  | 3.79359200  |
| H | 11.53403700 | 5.39437500  | 3.99349300  |
| H | 12.18976000 | 6.63155600  | 2.87448000  |
| N | 12.29611300 | 7.17962400  | 4.91382500  |

117

Th(TRENTIPS)I

|    |             |             |            |
|----|-------------|-------------|------------|
| Th | 11.46836900 | 9.84535700  | 4.94103900 |
| I  | 10.37788600 | 12.81119700 | 4.91754900 |
| Si | 15.11429600 | 10.81629500 | 4.70019100 |
| Si | 10.01027200 | 9.38873500  | 8.33973800 |
| Si | 9.55660300  | 9.15021000  | 1.79476100 |
| N  | 13.73132600 | 9.70549900  | 4.42951100 |
| N  | 11.08984400 | 8.86559500  | 7.00745100 |
| N  | 10.29604800 | 8.65925500  | 3.35237900 |
| C  | 16.22766700 | 10.24497500 | 6.18496900 |
| H  | 16.92832200 | 11.09528600 | 6.33585000 |
| C  | 15.42771800 | 10.07385000 | 7.49290200 |
| H  | 14.83383300 | 10.96941600 | 7.75141700 |
| H  | 16.09731500 | 9.86220200  | 8.35109700 |
| H  | 14.71986900 | 9.22721300  | 7.41487500 |
| C  | 17.09441400 | 8.99149700  | 5.92645300 |
| H  | 16.47511100 | 8.08743400  | 5.76920200 |
| H  | 17.74888700 | 8.78011200  | 6.79658300 |
| H  | 17.75073400 | 9.10337700  | 5.04442700 |
| C  | 16.28327800 | 10.82316400 | 3.15104700 |
| H  | 16.74891500 | 9.81365400  | 3.15229200 |
| C  | 17.44530200 | 11.83616100 | 3.29306800 |
| H  | 17.08204000 | 12.88031700 | 3.26979900 |
| H  | 18.16596100 | 11.72720100 | 2.45726300 |
| H  | 18.01185400 | 11.70226700 | 4.23318700 |
| C  | 15.58070800 | 10.98346300 | 1.78472800 |
| H  | 14.76295500 | 10.25324200 | 1.64922400 |
| H  | 16.30144300 | 10.83646500 | 0.95466700 |
| H  | 15.14441800 | 11.99067400 | 1.66326900 |
| C  | 14.40766700 | 12.56258200 | 5.12378300 |
| H  | 13.46198700 | 12.38503600 | 5.68692300 |
| C  | 15.31441500 | 13.41820200 | 6.04212800 |
| H  | 15.51524500 | 12.94023100 | 7.01672700 |
| H  | 14.83402300 | 14.39515700 | 6.24762100 |
| H  | 16.29056300 | 13.62987700 | 5.56677700 |
| C  | 14.02602900 | 13.38908900 | 3.87258700 |
| H  | 14.92885000 | 13.71424700 | 3.32230700 |
| H  | 13.46924300 | 14.29966900 | 4.16604800 |
| H  | 13.38287600 | 12.83102100 | 3.17131600 |
| C  | 14.12552700 | 8.41295400  | 3.80056900 |
| H  | 15.21707900 | 8.34053800  | 3.61873800 |
| H  | 13.65721400 | 8.29844400  | 2.79815500 |

|   |             |             |             |
|---|-------------|-------------|-------------|
| C | 13.72759500 | 7.22622000  | 4.68468300  |
| H | 14.03685500 | 6.25437100  | 4.23832000  |
| H | 14.23774800 | 7.32683700  | 5.65856700  |
| C | 9.39616300  | 7.86752200  | 9.38114200  |
| H | 10.30989100 | 7.47139100  | 9.87486500  |
| C | 8.44295800  | 8.30822300  | 10.51870700 |
| H | 8.88232800  | 9.09654400  | 11.15658900 |
| H | 8.19487900  | 7.45101400  | 11.17685000 |
| H | 7.48747800  | 8.69608400  | 10.11951300 |
| C | 8.77049700  | 6.69792400  | 8.58898900  |
| H | 7.80545700  | 6.98347800  | 8.13518900  |
| H | 8.57507100  | 5.83328300  | 9.25554800  |
| H | 9.42245100  | 6.34277700  | 7.77115900  |
| C | 8.56684500  | 10.37926500 | 7.53555800  |
| H | 9.04445400  | 10.97115400 | 6.72227600  |
| C | 7.90183400  | 11.41964400 | 8.46846100  |
| H | 7.40803100  | 10.94199800 | 9.33575700  |
| H | 7.12304900  | 11.98482700 | 7.91901600  |
| H | 8.62415400  | 12.15824900 | 8.85765600  |
| C | 7.48363900  | 9.49444500  | 6.87544400  |
| H | 7.90984500  | 8.72255200  | 6.20765500  |
| H | 6.79166000  | 10.11314400 | 6.27101700  |
| H | 6.87033100  | 8.97473500  | 7.63527200  |
| C | 10.95899600 | 10.54168300 | 9.57259100  |
| H | 10.18811000 | 10.95104600 | 10.26131600 |
| C | 12.00934200 | 9.80538600  | 10.43632100 |
| H | 11.56776200 | 8.99937500  | 11.05097600 |
| H | 12.50978200 | 10.50964100 | 11.13167300 |
| H | 12.80339000 | 9.35510200  | 9.81015000  |
| C | 11.61617600 | 11.73454800 | 8.84604200  |
| H | 12.40345500 | 11.38545400 | 8.14840500  |
| H | 12.10601200 | 12.42117300 | 9.56591400  |
| H | 10.89792800 | 12.32926100 | 8.25357500  |
| C | 11.99911500 | 7.74022600  | 7.34709700  |
| H | 11.75234300 | 7.26579800  | 8.31803500  |
| H | 13.05042200 | 8.08574100  | 7.45142900  |
| C | 11.92595900 | 6.65729100  | 6.26706400  |
| H | 12.59378600 | 5.79587800  | 6.49229900  |
| H | 10.89101400 | 6.27791300  | 6.22201500  |
| C | 7.62811500  | 9.21214900  | 1.91809000  |
| H | 7.27690800  | 9.40995500  | 0.88203500  |



|   |             |             |             |
|---|-------------|-------------|-------------|
| C | 7.12594400  | 10.36941200 | 2.80929900  |
| H | 7.53456100  | 10.29998400 | 3.83493200  |
| H | 6.02030700  | 10.35067900 | 2.89419500  |
| H | 7.40840700  | 11.36068700 | 2.41284400  |
| C | 6.99236500  | 7.87687800  | 2.37155900  |
| H | 7.29920700  | 7.01878900  | 1.74332400  |
| H | 5.88586200  | 7.93435500  | 2.33018200  |
| H | 7.26301400  | 7.64035700  | 3.41774400  |
| C | 10.01580600 | 7.84311300  | 0.43155800  |
| H | 9.87846600  | 6.85587100  | 0.92384300  |
| C | 11.49008400 | 7.90963800  | -0.02990700 |
| H | 11.67220000 | 8.80247700  | -0.65631000 |
| H | 11.75382500 | 7.02544900  | -0.64493700 |
| H | 12.19903800 | 7.95178100  | 0.81787600  |
| C | 9.07939600  | 7.84943200  | -0.80109200 |
| H | 8.02142000  | 7.68696700  | -0.52854500 |
| H | 9.36429400  | 7.04583100  | -1.51018800 |
| H | 9.13736700  | 8.80464000  | -1.35530400 |
| C | 10.15064800 | 10.93491100 | 1.39163000  |
| H | 9.74553700  | 11.54651700 | 2.22559800  |
| C | 11.67640800 | 11.16228000 | 1.37782900  |
| H | 12.19403300 | 10.79997900 | 2.29097400  |
| H | 11.90636200 | 12.24272400 | 1.29890300  |
| H | 12.16415700 | 10.65579200 | 0.52589900  |
| C | 9.53055300  | 11.49082800 | 0.08612000  |
| H | 9.93042500  | 10.97553300 | -0.80779100 |
| H | 9.76738200  | 12.56733800 | -0.02698700 |
| H | 8.42992000  | 11.39328200 | 0.06405000  |
| C | 10.12268700 | 7.22332400  | 3.70513000  |
| H | 9.53757100  | 6.65837700  | 2.95260100  |
| H | 9.55616600  | 7.11100100  | 4.65525000  |
| C | 11.49571900 | 6.55626900  | 3.84891000  |
| H | 11.41832700 | 5.46547400  | 4.05687000  |
| H | 12.04853200 | 6.68358700  | 2.90241800  |
| N | 12.25877700 | 7.23707900  | 4.93505100  |

117

Pa(TREN<sup>TIPS</sup>)F

|    |             |             |            |
|----|-------------|-------------|------------|
| Pa | 11.50856500 | 9.64863500  | 4.89036000 |
| F  | 10.87370200 | 11.67575200 | 4.75453500 |

|    |             |             |             |
|----|-------------|-------------|-------------|
| Si | 10.07932900 | 9.61498100  | 8.27843000  |
| Si | 15.06465600 | 10.63494300 | 4.77427800  |
| Si | 9.51545400  | 8.88564100  | 1.89043400  |
| N  | 11.10733200 | 8.89202400  | 7.00354300  |
| N  | 13.75727700 | 9.44657100  | 4.53109600  |
| N  | 10.36414700 | 8.36639000  | 3.37774100  |
| N  | 12.27598800 | 7.03539700  | 5.08178400  |
| C  | 8.96195700  | 8.21991800  | 9.03487200  |
| H  | 9.68836700  | 7.50156300  | 9.47541200  |
| C  | 8.13183400  | 7.43451100  | 7.99489600  |
| H  | 7.29175200  | 8.04032100  | 7.60869100  |
| H  | 7.69328000  | 6.52000400  | 8.44333000  |
| H  | 8.74004200  | 7.12826900  | 7.12427000  |
| C  | 8.05969200  | 8.69715200  | 10.19669400 |
| H  | 8.62665700  | 9.22886000  | 10.98254900 |
| H  | 7.55080000  | 7.83843000  | 10.67971400 |
| H  | 7.26737700  | 9.37980100  | 9.83737200  |
| C  | 9.10564800  | 11.08975200 | 7.49868500  |
| H  | 9.88262700  | 11.69570800 | 6.98579400  |
| C  | 8.43529600  | 12.02198700 | 8.53654200  |
| H  | 7.64412600  | 11.50264600 | 9.10867900  |
| H  | 7.95563300  | 12.88080700 | 8.02571200  |
| H  | 9.15498900  | 12.43635300 | 9.26499700  |
| C  | 8.07539900  | 10.67860900 | 6.42440700  |
| H  | 8.49314600  | 9.98034300  | 5.67285300  |
| H  | 7.70522500  | 11.56580300 | 5.87413300  |
| H  | 7.19767400  | 10.17840100 | 6.87476800  |
| C  | 11.12568800 | 10.35316500 | 9.73177100  |
| H  | 10.37391000 | 10.82762000 | 10.39987900 |
| C  | 12.08341500 | 11.46169000 | 9.24466700  |
| H  | 12.83175700 | 11.05267200 | 8.53966600  |
| H  | 12.63869500 | 11.91327000 | 10.09166700 |
| H  | 11.55337600 | 12.27976400 | 8.72333200  |
| C  | 11.89213400 | 9.31626500  | 10.58411600 |
| H  | 11.23183100 | 8.51873800  | 10.97285800 |
| H  | 12.36964400 | 9.80206400  | 11.45929000 |
| H  | 12.70096200 | 8.83088100  | 10.00662100 |
| C  | 11.88602600 | 7.70411700  | 7.44432600  |
| H  | 11.52348900 | 7.28982200  | 8.40749500  |
| H  | 12.95021100 | 7.97200300  | 7.61910900  |
| C  | 11.80813800 | 6.56954800  | 6.41416300  |

|   |             |             |            |
|---|-------------|-------------|------------|
| H | 12.39328600 | 5.68053200  | 6.74304700 |
| H | 10.75347100 | 6.25939900  | 6.31259800 |
| C | 14.24804100 | 12.30113600 | 5.32146000 |
| H | 13.37834600 | 12.00632600 | 5.95257600 |
| C | 13.69496900 | 13.14052200 | 4.14502600 |
| H | 14.51906400 | 13.54111100 | 3.52600500 |
| H | 13.11493400 | 14.00430300 | 4.52469600 |
| H | 13.02318400 | 12.56671100 | 3.48465000 |
| C | 15.15500700 | 13.19520100 | 6.20205100 |
| H | 15.47338800 | 12.69994200 | 7.13594400 |
| H | 14.61736000 | 14.12106800 | 6.48843900 |
| H | 16.06825300 | 13.50586900 | 5.66024200 |
| C | 16.32593200 | 10.10859800 | 6.15866500 |
| H | 16.94214500 | 11.02375100 | 6.29909100 |
| C | 15.65155200 | 9.79954800  | 7.51235300 |
| H | 14.96642000 | 10.60142800 | 7.84144800 |
| H | 16.40533100 | 9.65719300  | 8.31330500 |
| H | 15.05646900 | 8.86819300  | 7.45606100 |
| C | 17.30441700 | 8.96851900  | 5.79211500 |
| H | 16.78088100 | 7.99897500  | 5.68873600 |
| H | 18.06472800 | 8.83369600  | 6.58850600 |
| H | 17.84962200 | 9.15770800  | 4.84964800 |
| C | 16.11086300 | 10.78697300 | 3.14857500 |
| H | 16.62951500 | 9.80606400  | 3.07329700 |
| C | 17.21582400 | 11.86599500 | 3.23484200 |
| H | 16.78784200 | 12.88456200 | 3.29035600 |
| H | 17.86690400 | 11.83847300 | 2.33749000 |
| H | 17.86773000 | 11.73149900 | 4.11780900 |
| C | 15.28293700 | 10.94397100 | 1.85426300 |
| H | 14.49577100 | 10.17272800 | 1.77329900 |
| H | 15.93222400 | 10.85745100 | 0.95918100 |
| H | 14.78577000 | 11.92896000 | 1.80174300 |
| C | 14.21248600 | 8.13094300  | 4.00934000 |
| H | 15.31465700 | 8.06663900  | 3.90163700 |
| H | 13.81054700 | 7.94881200  | 2.98880700 |
| C | 13.75888100 | 7.00723400  | 4.95069900 |
| H | 14.09945400 | 6.00513200  | 4.60349600 |
| H | 14.19685100 | 7.18812200  | 5.94773500 |
| C | 7.61770400  | 8.48609000  | 1.94605400 |
| H | 7.21773600  | 9.01548800  | 1.05386400 |
| C | 6.92743600  | 9.08872900  | 3.18859800 |

|   |             |             |             |
|---|-------------|-------------|-------------|
| H | 7.27553600  | 8.59385900  | 4.11438200  |
| H | 5.82741400  | 8.95668900  | 3.13783400  |
| H | 7.12524300  | 10.17041500 | 3.30221000  |
| C | 7.22232600  | 6.99895500  | 1.79180200  |
| H | 7.67601200  | 6.52614100  | 0.90124500  |
| H | 6.12251700  | 6.89720400  | 1.69139800  |
| H | 7.51699500  | 6.40388500  | 2.67633300  |
| C | 9.68626200  | 10.80676400 | 1.73202200  |
| H | 9.51374900  | 11.19995100 | 2.75616400  |
| C | 8.61196600  | 11.46046900 | 0.82734100  |
| H | 8.68176200  | 11.10990300 | -0.21937400 |
| H | 8.74541200  | 12.56067900 | 0.81107900  |
| H | 7.58338200  | 11.26155600 | 1.17735400  |
| C | 11.08912500 | 11.29005900 | 1.29522900  |
| H | 11.90666100 | 10.84769200 | 1.89774000  |
| H | 11.17057300 | 12.39046100 | 1.39329800  |
| H | 11.29258200 | 11.03808900 | 0.23736100  |
| C | 10.22915000 | 7.91137400  | 0.37229900  |
| H | 9.94703300  | 6.85459200  | 0.57465100  |
| C | 9.56399100  | 8.29766800  | -0.97002200 |
| H | 8.46090200  | 8.23416500  | -0.93249100 |
| H | 9.90505100  | 7.62983200  | -1.78708200 |
| H | 9.82794700  | 9.32997500  | -1.26737600 |
| C | 11.76728500 | 7.94227100  | 0.23764500  |
| H | 12.13010200 | 8.94109800  | -0.06440700 |
| H | 12.11224100 | 7.22293000  | -0.53276900 |
| H | 12.27015400 | 7.68663900  | 1.18789800  |
| C | 10.24671000 | 6.91012400  | 3.65081200  |
| H | 9.83758200  | 6.34319200  | 2.78880700  |
| H | 9.54032800  | 6.71969100  | 4.48831400  |
| C | 11.61631500 | 6.29899300  | 3.97124700  |
| H | 11.53487400 | 5.21540100  | 4.21660100  |
| H | 12.25583200 | 6.39240100  | 3.07687800  |

117

Pa(TREN<sup>TIPS</sup>)Cl

|    |             |             |            |
|----|-------------|-------------|------------|
| Pa | 11.48166800 | 9.69373800  | 4.94595600 |
| Cl | 10.58101000 | 12.18254500 | 4.94474700 |
| Si | 9.97557600  | 9.33758000  | 8.28388000 |
| Si | 15.05492800 | 10.72829700 | 4.79931800 |

|    |             |             |             |
|----|-------------|-------------|-------------|
| Si | 9.58395600  | 9.13051300  | 1.81997500  |
| N  | 11.05640700 | 8.74800700  | 6.97254900  |
| N  | 13.71189200 | 9.57315400  | 4.49473100  |
| N  | 10.36726500 | 8.55329700  | 3.33072100  |
| N  | 12.26516000 | 7.09637500  | 4.94804300  |
| C  | 9.38025500  | 7.84788400  | 9.38408900  |
| H  | 10.30191600 | 7.49142100  | 9.89340100  |
| C  | 8.78086900  | 6.63290200  | 8.64034000  |
| H  | 7.80249900  | 6.87207500  | 8.18767100  |
| H  | 8.61824300  | 5.78754300  | 9.33970700  |
| H  | 9.43359400  | 6.26800800  | 7.82754700  |
| C  | 8.41834300  | 8.30951700  | 10.50566200 |
| H  | 8.82927400  | 9.14726200  | 11.09755800 |
| H  | 8.20903100  | 7.47841100  | 11.20920900 |
| H  | 7.44543100  | 8.63683900  | 10.09486400 |
| C  | 8.50231200  | 10.29838500 | 7.49015600  |
| H  | 8.93940800  | 10.88240000 | 6.65243400  |
| C  | 7.84371300  | 11.33189700 | 8.43675800  |
| H  | 7.38059800  | 10.85136800 | 9.31896900  |
| H  | 7.03996300  | 11.87932900 | 7.90507000  |
| H  | 8.56229800  | 12.08501500 | 8.80444700  |
| C  | 7.42000100  | 9.37187600  | 6.88942700  |
| H  | 7.84527600  | 8.61650900  | 6.20278800  |
| H  | 6.67510500  | 9.95987000  | 6.31830500  |
| H  | 6.86683400  | 8.83290300  | 7.68131500  |
| C  | 10.93619800 | 10.53155800 | 9.46545700  |
| H  | 10.17802900 | 10.92971800 | 10.17490200 |
| C  | 11.53742600 | 11.73168700 | 8.70232500  |
| H  | 12.28879300 | 11.39292800 | 7.96161500  |
| H  | 12.05191100 | 12.42801300 | 9.39559500  |
| H  | 10.77982300 | 12.31178300 | 8.14609400  |
| C  | 12.03141300 | 9.83219900  | 10.30282300 |
| H  | 11.63089200 | 9.01586700  | 10.93151700 |
| H  | 12.52803300 | 10.55473800 | 10.98195200 |
| H  | 12.82186600 | 9.40398900  | 9.65753600  |
| C  | 11.93633300 | 7.60960100  | 7.34705400  |
| H  | 11.64106300 | 7.14330600  | 8.30748100  |
| H  | 12.98769300 | 7.93904300  | 7.49065900  |
| C  | 11.88459200 | 6.52374400  | 6.26781400  |
| H  | 12.53592100 | 5.65643600  | 6.51788700  |
| H  | 10.84734400 | 6.15523500  | 6.18950200  |

|   |             |             |            |
|---|-------------|-------------|------------|
| C | 14.30316200 | 12.45891500 | 5.21146600 |
| H | 13.36801600 | 12.25356800 | 5.77843300 |
| C | 13.89306100 | 13.27131600 | 3.96023100 |
| H | 14.78289400 | 13.62423900 | 3.40528300 |
| H | 13.31098800 | 14.16583700 | 4.25516800 |
| H | 13.26546900 | 12.69305700 | 3.26129100 |
| C | 15.19462500 | 13.33594200 | 6.12426900 |
| H | 15.40848800 | 12.86158100 | 7.09781800 |
| H | 14.69255100 | 14.30159100 | 6.33237300 |
| H | 16.16427600 | 13.57085200 | 5.64667800 |
| C | 16.15329900 | 10.17343000 | 6.30140300 |
| H | 16.83589300 | 11.03505800 | 6.47021100 |
| C | 15.33110800 | 9.97902800  | 7.59198700 |
| H | 14.72919600 | 10.86790300 | 7.85339400 |
| H | 15.98646400 | 9.75448100  | 8.45803800 |
| H | 14.62607400 | 9.13350300  | 7.48408900 |
| C | 17.04685400 | 8.93695000  | 6.05234300 |
| H | 16.44637200 | 8.02271300  | 5.88175200 |
| H | 17.68953200 | 8.73416500  | 6.93323100 |
| H | 17.71646800 | 9.06363500  | 5.18236800 |
| C | 16.24986000 | 10.76121600 | 3.27075500 |
| H | 16.73809000 | 9.76249300  | 3.27992500 |
| C | 17.38620100 | 11.80040000 | 3.43324400 |
| H | 17.00006100 | 12.83609500 | 3.39943500 |
| H | 18.12469400 | 11.70528100 | 2.61144200 |
| H | 17.93783600 | 11.68180700 | 4.38425100 |
| C | 15.57119500 | 10.90794300 | 1.89117100 |
| H | 14.78422600 | 10.14983400 | 1.73078900 |
| H | 16.31517400 | 10.79505400 | 1.07632300 |
| H | 15.10047200 | 11.89934700 | 1.76820800 |
| C | 14.14855000 | 8.29131200  | 3.87247600 |
| H | 15.24695400 | 8.24076400  | 3.73163800 |
| H | 13.71518400 | 8.17541800  | 2.85547600 |
| C | 13.73926800 | 7.09757100  | 4.74299500 |
| H | 14.07059200 | 6.12993900  | 4.30337300 |
| H | 14.21886600 | 7.20139000  | 5.73204600 |
| C | 7.66819800  | 9.25353200  | 2.04453600 |
| H | 7.27700400  | 9.58012700  | 1.05646900 |
| C | 7.27333200  | 10.32850200 | 3.08004700 |
| H | 7.70711000  | 10.10503800 | 4.07214800 |
| H | 6.17199200  | 10.37464100 | 3.20320000 |

|   |             |             |             |
|---|-------------|-------------|-------------|
| H | 7.61702900  | 11.33857400 | 2.79403000  |
| C | 6.99118900  | 7.90586100  | 2.38443500  |
| H | 7.21800000  | 7.11488800  | 1.64460500  |
| H | 5.88841900  | 8.01613300  | 2.41884800  |
| H | 7.30813500  | 7.53737100  | 3.37814100  |
| C | 10.22481100 | 10.90570600 | 1.43786800  |
| H | 9.97383000  | 11.48426900 | 2.35166200  |
| C | 9.48267500  | 11.58615700 | 0.26174500  |
| H | 9.72607300  | 11.10833800 | -0.70575300 |
| H | 9.78423500  | 12.64949100 | 0.18164200  |
| H | 8.38401700  | 11.56481800 | 0.37763900  |
| C | 11.75003100 | 11.02829300 | 1.23369800  |
| H | 12.33111300 | 10.55034100 | 2.04704500  |
| H | 12.05428300 | 12.09297500 | 1.19633900  |
| H | 12.07567800 | 10.56304900 | 0.28537400  |
| C | 9.91051800  | 7.84736200  | 0.39573400  |
| H | 9.58720100  | 6.87267400  | 0.82095500  |
| C | 9.03931100  | 8.07462600  | -0.86269400 |
| H | 7.96061500  | 8.11335800  | -0.62748700 |
| H | 9.18850300  | 7.25406700  | -1.59364900 |
| H | 9.30146400  | 9.01663800  | -1.37830000 |
| C | 11.39463800 | 7.69079600  | -0.00527200 |
| H | 11.75262100 | 8.57037600  | -0.57061200 |
| H | 11.53907800 | 6.80604800  | -0.65800300 |
| H | 12.05845900 | 7.57372600  | 0.87108900  |
| C | 10.17441300 | 7.10964800  | 3.64159400  |
| H | 9.62886200  | 6.56565700  | 2.84541800  |
| H | 9.56184200  | 6.97683500  | 4.55971900  |
| C | 11.53611800 | 6.43115900  | 3.83247900  |
| H | 11.43981700 | 5.33992900  | 4.02961100  |
| H | 12.12572600 | 6.55850400  | 2.90867800  |

117

Pa(TREN<sup>TIPS</sup>)Br

|    |             |             |            |
|----|-------------|-------------|------------|
| Pa | 11.47300000 | 9.72026300  | 4.94818300 |
| Br | 10.50833500 | 12.36794800 | 4.91715000 |
| Si | 9.96706400  | 9.34534800  | 8.27947600 |
| Si | 15.05534700 | 10.72493800 | 4.80075500 |
| Si | 9.59004700  | 9.12452500  | 1.82328800 |
| N  | 11.05697000 | 8.76508600  | 6.96928900 |

|   |             |             |             |
|---|-------------|-------------|-------------|
| N | 13.70060900 | 9.58011700  | 4.49680500  |
| N | 10.35967200 | 8.56482100  | 3.35007500  |
| N | 12.25817900 | 7.10191200  | 4.95393400  |
| C | 9.38306100  | 7.85397300  | 9.38347900  |
| H | 10.30663600 | 7.50597400  | 9.89515400  |
| C | 8.79258500  | 6.63103700  | 8.64573300  |
| H | 7.81316200  | 6.86064400  | 8.19032100  |
| H | 8.63459500  | 5.78889900  | 9.35000300  |
| H | 9.44910500  | 6.26532600  | 7.83652100  |
| C | 8.41681700  | 8.31401600  | 10.50210700 |
| H | 8.81953200  | 9.15962300  | 11.08837900 |
| H | 8.21528900  | 7.48564400  | 11.21106900 |
| H | 7.44097600  | 8.62921800  | 10.08885200 |
| C | 8.48524400  | 10.28833700 | 7.48020300  |
| H | 8.91731400  | 10.87814000 | 6.64356900  |
| C | 7.81341900  | 11.31637200 | 8.42290100  |
| H | 7.35017200  | 10.83253500 | 9.30318300  |
| H | 7.00801400  | 11.85728300 | 7.88718000  |
| H | 8.52462900  | 12.07508700 | 8.79341400  |
| C | 7.41662700  | 9.34957800  | 6.87456000  |
| H | 7.85490600  | 8.59719300  | 6.19271100  |
| H | 6.67020700  | 9.92865700  | 6.29639700  |
| H | 6.86346200  | 8.80648700  | 7.66360700  |
| C | 10.91930200 | 10.54776200 | 9.46019400  |
| H | 10.15839600 | 10.94499800 | 10.16712700 |
| C | 11.51882900 | 11.74886200 | 8.69786300  |
| H | 12.26921700 | 11.41272700 | 7.95450500  |
| H | 12.03557000 | 12.44325500 | 9.39139900  |
| H | 10.76052600 | 12.33071700 | 8.14472200  |
| C | 12.01473200 | 9.85337100  | 10.30157200 |
| H | 11.61539700 | 9.03700600  | 10.93083400 |
| H | 12.50713400 | 10.57896600 | 10.98046500 |
| H | 12.80826000 | 9.42659900  | 9.65911100  |
| C | 11.94207600 | 7.63118400  | 7.34887700  |
| H | 11.65600800 | 7.17379500  | 8.31631400  |
| H | 12.99296900 | 7.96577600  | 7.48125900  |
| C | 11.88747900 | 6.53684100  | 6.27872500  |
| H | 12.54277800 | 5.67368200  | 6.53329300  |
| H | 10.85139500 | 6.16339300  | 6.20985500  |
| C | 14.31961900 | 12.46157100 | 5.21658300  |
| H | 13.37448600 | 12.26595600 | 5.77114600  |



|   |             |             |            |
|---|-------------|-------------|------------|
| C | 13.93485800 | 13.28627200 | 3.96540600 |
| H | 14.83567200 | 13.63063300 | 3.42322200 |
| H | 13.36036500 | 14.18615600 | 4.25866800 |
| H | 13.30738100 | 12.72041800 | 3.25641300 |
| C | 15.20993400 | 13.32310800 | 6.14516800 |
| H | 15.40323600 | 12.84344800 | 7.12041900 |
| H | 14.71811000 | 14.29497900 | 6.34849500 |
| H | 16.18953000 | 13.54587300 | 5.68219200 |
| C | 16.15239600 | 10.16103900 | 6.29988500 |
| H | 16.83903300 | 11.01977400 | 6.46702000 |
| C | 15.33358600 | 9.97023600  | 7.59308700 |
| H | 14.72688400 | 10.85704500 | 7.85066700 |
| H | 15.99177100 | 9.75456600  | 8.45918700 |
| H | 14.63403700 | 9.11954800  | 7.49209700 |
| C | 17.04013800 | 8.92096800  | 6.04807000 |
| H | 16.43551900 | 8.00969800  | 5.87636300 |
| H | 17.68282400 | 8.71390600  | 6.92794000 |
| H | 17.70939400 | 9.04628200  | 5.17765100 |
| C | 16.24889300 | 10.75138000 | 3.27098500 |
| H | 16.72855000 | 9.74854600  | 3.27696400 |
| C | 17.39489000 | 11.77965200 | 3.43600500 |
| H | 17.01859900 | 12.81907300 | 3.40712800 |
| H | 18.13117700 | 11.68093700 | 2.61266100 |
| H | 17.94694700 | 11.65199200 | 4.38558500 |
| C | 15.57046300 | 10.90775000 | 1.89238200 |
| H | 14.77320400 | 10.16019600 | 1.73318900 |
| H | 16.31164800 | 10.78516900 | 1.07644300 |
| H | 15.11287000 | 11.90538000 | 1.77060800 |
| C | 14.13206100 | 8.29871200  | 3.86740200 |
| H | 15.22894300 | 8.24878300  | 3.71547500 |
| H | 13.68907500 | 8.18686000  | 2.85411700 |
| C | 13.72939400 | 7.10238600  | 4.73682500 |
| H | 14.05891600 | 6.13691300  | 4.29076100 |
| H | 14.21765700 | 7.20237000  | 5.72205200 |
| C | 7.67332900  | 9.24662100  | 2.03386100 |
| H | 7.28917000  | 9.54620700  | 1.03456800 |
| C | 7.26696400  | 10.34660600 | 3.03833600 |
| H | 7.70437000  | 10.15914300 | 4.03637900 |
| H | 6.16524200  | 10.38256100 | 3.16104400 |
| H | 7.59797500  | 11.35189600 | 2.72247800 |
| C | 6.99828600  | 7.90569800  | 2.40333000 |

|   |             |             |             |
|---|-------------|-------------|-------------|
| H | 7.24051200  | 7.09431700  | 1.69083800  |
| H | 5.89458400  | 8.01063000  | 2.41791200  |
| H | 7.30208400  | 7.56865700  | 3.41213500  |
| C | 10.22591200 | 10.89642100 | 1.42463600  |
| H | 9.93835300  | 11.49129000 | 2.31704200  |
| C | 9.51284100  | 11.53962100 | 0.21012300  |
| H | 9.78846100  | 11.04054300 | -0.73797400 |
| H | 9.80646700  | 12.60367500 | 0.11218900  |
| H | 8.41151500  | 11.51009600 | 0.29517400  |
| C | 11.75451300 | 11.03783700 | 1.26729600  |
| H | 12.31851100 | 10.58096100 | 2.10457700  |
| H | 12.04481600 | 12.10601300 | 1.22317800  |
| H | 12.11684800 | 10.56155400 | 0.33831600  |
| C | 9.94015100  | 7.82851900  | 0.41630200  |
| H | 9.67765000  | 6.84660100  | 0.86662900  |
| C | 9.03082700  | 7.98790200  | -0.82596800 |
| H | 7.95650100  | 7.96451600  | -0.57001900 |
| H | 9.21494100  | 7.16832900  | -1.55003800 |
| H | 9.22480600  | 8.93724000  | -1.35872800 |
| C | 11.42055100 | 7.74036500  | -0.02034900 |
| H | 11.71416700 | 8.62214900  | -0.61886000 |
| H | 11.59448800 | 6.84761800  | -0.65468800 |
| H | 12.11442200 | 7.68250100  | 0.83876500  |
| C | 10.15668000 | 7.12456800  | 3.67264900  |
| H | 9.58947000  | 6.58212300  | 2.89084000  |
| H | 9.55910500  | 7.00568700  | 4.60224900  |
| C | 11.51600100 | 6.43729100  | 3.84756500  |
| H | 11.41499000 | 5.34669800  | 4.04665100  |
| H | 12.09559400 | 6.55995500  | 2.91659200  |

117

Pa(TREN<sup>TIPS</sup>)I

|    |             |             |            |
|----|-------------|-------------|------------|
| Pa | 11.44596200 | 9.78763700  | 4.97352100 |
| I  | 10.37940200 | 12.69214700 | 4.93531900 |
| Si | 9.96207000  | 9.34898500  | 8.34059700 |
| Si | 15.06109200 | 10.73151900 | 4.75781000 |
| Si | 9.57499200  | 9.11583000  | 1.82190100 |
| N  | 11.05534100 | 8.84281400  | 7.00271300 |
| N  | 13.65978600 | 9.63973900  | 4.45929400 |
| N  | 10.30217500 | 8.64275800  | 3.40117600 |

|   |             |             |             |
|---|-------------|-------------|-------------|
| N | 12.21928800 | 7.17476100  | 4.97101900  |
| C | 9.36295800  | 7.80700900  | 9.36258500  |
| H | 10.28129100 | 7.40501500  | 9.84258700  |
| C | 8.73085200  | 6.64777200  | 8.56068000  |
| H | 7.76535700  | 6.94098600  | 8.11309600  |
| H | 8.53544700  | 5.77690200  | 9.21909400  |
| H | 9.37874300  | 6.29874500  | 7.73726600  |
| C | 8.41913400  | 8.22752300  | 10.51588000 |
| H | 8.86193800  | 9.00634100  | 11.16293100 |
| H | 8.18010800  | 7.35858700  | 11.16186000 |
| H | 7.45878700  | 8.61863000  | 10.13213300 |
| C | 8.50389600  | 10.34352800 | 7.57253200  |
| H | 8.97074400  | 10.94838300 | 6.76530300  |
| C | 7.84355100  | 11.35853000 | 8.53687000  |
| H | 7.36847300  | 10.86136300 | 9.40353100  |
| H | 7.04985200  | 11.92439900 | 8.00973900  |
| H | 8.56384000  | 12.09848000 | 8.92760000  |
| C | 7.41979500  | 9.46532700  | 6.90615600  |
| H | 7.84700100  | 8.71698800  | 6.21302900  |
| H | 6.71620300  | 10.09342000 | 6.32512900  |
| H | 6.81933900  | 8.92162300  | 7.65953200  |
| C | 10.91459100 | 10.48230200 | 9.58891100  |
| H | 10.13986500 | 10.87039600 | 10.28575400 |
| C | 11.56149900 | 11.69557700 | 8.88760300  |
| H | 12.34026600 | 11.36739600 | 8.17131700  |
| H | 12.05306100 | 12.36508400 | 9.62236100  |
| H | 10.83493200 | 12.30115800 | 8.31693400  |
| C | 11.97062700 | 9.73946000  | 10.44000100 |
| H | 11.53722400 | 8.91510700  | 11.03609100 |
| H | 12.45952900 | 10.43509100 | 11.15195400 |
| H | 12.77257500 | 9.31295400  | 9.80761500  |
| C | 11.99129300 | 7.74220200  | 7.36188100  |
| H | 11.77083400 | 7.30116700  | 8.35387600  |
| H | 13.03585100 | 8.11107500  | 7.42961700  |
| C | 11.91342900 | 6.62436400  | 6.31894800  |
| H | 12.59619100 | 5.77921500  | 6.55891900  |
| H | 10.88352700 | 6.23011400  | 6.29962500  |
| C | 14.38283600 | 12.47573300 | 5.22840300  |
| H | 13.43486900 | 12.29129600 | 5.78324400  |
| C | 14.01468600 | 13.33825000 | 3.99826200  |
| H | 14.91993500 | 13.65069200 | 3.44504200  |

|   |             |             |            |
|---|-------------|-------------|------------|
| H | 13.48572700 | 14.25726800 | 4.31658100 |
| H | 13.34770500 | 12.81264300 | 3.29399000 |
| C | 15.30077300 | 13.29166100 | 6.17135900 |
| H | 15.48904200 | 12.78582900 | 7.13479000 |
| H | 14.83486400 | 14.27049100 | 6.40026800 |
| H | 16.28269000 | 13.50115700 | 5.70665500 |
| C | 16.20040400 | 10.11743700 | 6.20543900 |
| H | 16.88898500 | 10.97768700 | 6.35567600 |
| C | 15.44898300 | 9.90031000  | 7.53537800 |
| H | 14.77717100 | 10.73849400 | 7.79471400 |
| H | 16.15658500 | 9.76634000  | 8.37851300 |
| H | 14.82704600 | 8.98693800  | 7.48944100 |
| C | 17.08500800 | 8.88783500  | 5.89673600 |
| H | 16.47934500 | 7.97616400  | 5.72921200 |
| H | 17.76064700 | 8.66712400  | 6.74821700 |
| H | 17.72163700 | 9.03373800  | 5.00560000 |
| C | 16.21666800 | 10.76360000 | 3.19636900 |
| H | 16.67420500 | 9.75071700  | 3.16918600 |
| C | 17.39012400 | 11.76142600 | 3.35673800 |
| H | 17.03841800 | 12.80962400 | 3.36404100 |
| H | 18.10185800 | 11.66668900 | 2.51158800 |
| H | 17.96435400 | 11.59725700 | 4.28733000 |
| C | 15.51186200 | 10.96323700 | 1.83703100 |
| H | 14.69505600 | 10.23640200 | 1.68216000 |
| H | 16.23222400 | 10.83948500 | 1.00285200 |
| H | 15.07421100 | 11.97272500 | 1.74324800 |
| C | 14.04300400 | 8.35950800  | 3.79629700 |
| H | 15.12863500 | 8.30194500  | 3.58113500 |
| H | 13.54232400 | 8.25799800  | 2.80935900 |
| C | 13.67841400 | 7.16305000  | 4.68102100 |
| H | 13.97544900 | 6.19560500  | 4.21783100 |
| H | 14.21647200 | 7.25696000  | 5.64054900 |
| C | 7.64821900  | 9.21447200  | 1.95455500 |
| H | 7.30846800  | 9.42250000  | 0.91653300 |
| C | 7.16884100  | 10.38303800 | 2.84393100 |
| H | 7.54487800  | 10.28482500 | 3.87906500 |
| H | 6.06125200  | 10.40855800 | 2.89583300 |
| H | 7.50403000  | 11.36636100 | 2.46920100 |
| C | 6.97282000  | 7.89647400  | 2.40055400 |
| H | 7.27107400  | 7.02905100  | 1.78120900 |
| H | 5.86908500  | 7.98057700  | 2.33742200 |

|   |             |             |             |
|---|-------------|-------------|-------------|
| H | 7.21606500  | 7.65825000  | 3.45295500  |
| C | 10.20088800 | 10.87161600 | 1.35340300  |
| H | 9.88624200  | 11.49675900 | 2.21582900  |
| C | 9.50508400  | 11.45320400 | 0.09815000  |
| H | 9.81325200  | 10.92360700 | -0.82337900 |
| H | 9.78099000  | 12.51815600 | -0.03456200 |
| H | 8.40291600  | 11.40548600 | 0.15845300  |
| C | 11.72991700 | 11.03298600 | 1.22377700  |
| H | 12.28278900 | 10.60544800 | 2.08319200  |
| H | 12.00369600 | 12.10470100 | 1.16314100  |
| H | 12.11803400 | 10.54295100 | 0.31271300  |
| C | 9.99813300  | 7.74923900  | 0.50377700  |
| H | 9.79263700  | 6.78302900  | 1.01430800  |
| C | 9.08850400  | 7.77825700  | -0.74903800 |
| H | 8.01732400  | 7.68143400  | -0.49769400 |
| H | 9.34327400  | 6.94349200  | -1.43309100 |
| H | 9.21244200  | 8.71522300  | -1.32303700 |
| C | 11.48206100 | 7.72012900  | 0.06876300  |
| H | 11.71916200 | 8.56948600  | -0.59792100 |
| H | 11.71106700 | 6.79369000  | -0.49586100 |
| H | 12.17988100 | 7.77281300  | 0.92508900  |
| C | 10.07113700 | 7.21896600  | 3.77965000  |
| H | 9.45003900  | 6.67560400  | 3.04179800  |
| H | 9.51573700  | 7.14570200  | 4.73891200  |
| C | 11.41869700 | 6.50098600  | 3.91036300  |
| H | 11.30428600 | 5.41822000  | 4.13973800  |
| H | 11.96036000 | 6.59088900  | 2.95342700  |

117

U(TREN<sup>TIPS</sup>)F

|    |             |             |            |
|----|-------------|-------------|------------|
| U  | 11.53169400 | 9.58908500  | 4.88055100 |
| F  | 11.02444100 | 11.63534700 | 4.95461900 |
| Si | 10.04015600 | 9.61986400  | 8.26045100 |
| Si | 15.09593000 | 10.64323200 | 4.74159700 |
| Si | 9.49603700  | 8.86329400  | 1.94064100 |
| N  | 11.07388400 | 8.89505000  | 6.99523300 |
| N  | 13.77880200 | 9.46465200  | 4.49919000 |
| N  | 10.34918400 | 8.29573400  | 3.39919800 |
| N  | 12.27994000 | 7.04903100  | 5.06883500 |
| C  | 8.94472800  | 8.21640200  | 9.03505300 |

|   |             |             |             |
|---|-------------|-------------|-------------|
| H | 9.68348700  | 7.49794100  | 9.45412800  |
| C | 8.09798100  | 7.43711700  | 8.00381600  |
| H | 7.24585400  | 8.04224600  | 7.64267600  |
| H | 7.67399100  | 6.51450400  | 8.44975200  |
| H | 8.68985800  | 7.14562600  | 7.11689800  |
| C | 8.06455800  | 8.67621300  | 10.22039000 |
| H | 8.64569900  | 9.20099200  | 11.00044100 |
| H | 7.56907800  | 7.80972400  | 10.70369800 |
| H | 7.26279300  | 9.36018800  | 9.88625000  |
| C | 9.04824300  | 11.06542300 | 7.45682200  |
| H | 9.82818200  | 11.70561200 | 6.99583000  |
| C | 8.28522000  | 11.95012100 | 8.47131700  |
| H | 7.47513500  | 11.39409500 | 8.97876700  |
| H | 7.81303100  | 12.80892400 | 7.95303000  |
| H | 8.94472800  | 12.36569100 | 9.25482200  |
| C | 8.09809900  | 10.63338800 | 6.31950500  |
| H | 8.58118000  | 9.96681700  | 5.57827400  |
| H | 7.72118300  | 11.51533200 | 5.76489100  |
| H | 7.21833500  | 10.08699500 | 6.70779700  |
| C | 11.07724000 | 10.39056200 | 9.70385300  |
| H | 10.32095400 | 10.84979600 | 10.37744200 |
| C | 12.00612400 | 11.52007700 | 9.20862400  |
| H | 12.75776100 | 11.12989700 | 8.49638300  |
| H | 12.55885800 | 11.98235100 | 10.05155200 |
| H | 11.45270700 | 12.32624000 | 8.69360500  |
| C | 11.87311800 | 9.37047400  | 10.54962200 |
| H | 11.23387300 | 8.55983500  | 10.94685000 |
| H | 12.35106500 | 9.86674300  | 11.41871500 |
| H | 12.68466400 | 8.90098600  | 9.96281900  |
| C | 11.86044000 | 7.71277400  | 7.43329700  |
| H | 11.49809000 | 7.28919600  | 8.39276300  |
| H | 12.92167800 | 7.98885900  | 7.61810100  |
| C | 11.80175800 | 6.58029300  | 6.40030000  |
| H | 12.39178800 | 5.69562000  | 6.73210400  |
| H | 10.75088600 | 6.26181700  | 6.28675700  |
| C | 14.31057500 | 12.33120500 | 5.26222500  |
| H | 13.44948400 | 12.06992500 | 5.91525400  |
| C | 13.74648000 | 13.14399300 | 4.07273700  |
| H | 14.56308200 | 13.52115200 | 3.42900100  |
| H | 13.17990600 | 14.02283800 | 4.43816900  |
| H | 13.05949400 | 12.55692500 | 3.44095800  |

|   |             |             |            |
|---|-------------|-------------|------------|
| C | 15.25014400 | 13.23608500 | 6.09671600 |
| H | 15.57991300 | 12.76409600 | 7.03879400 |
| H | 14.73185100 | 14.17786900 | 6.36695300 |
| H | 16.15699200 | 13.51744800 | 5.52897900 |
| C | 16.33163700 | 10.11517800 | 6.14786300 |
| H | 16.97481900 | 11.01451200 | 6.26727700 |
| C | 15.63392400 | 9.86775400  | 7.50269500 |
| H | 14.97797300 | 10.70396000 | 7.80509800 |
| H | 16.37440200 | 9.71695700  | 8.31444300 |
| H | 15.00369300 | 8.95864200  | 7.46462900 |
| C | 17.27587800 | 8.93491000  | 5.82312700 |
| H | 16.72351100 | 7.97894200  | 5.74722700 |
| H | 18.02852300 | 8.80187100  | 6.62708700 |
| H | 17.83044100 | 9.07791300  | 4.87791800 |
| C | 16.16031500 | 10.75758500 | 3.12273000 |
| H | 16.66997900 | 9.77058300  | 3.06744600 |
| C | 17.27589100 | 11.82623500 | 3.19900500 |
| H | 16.85861100 | 12.85024900 | 3.22841900 |
| H | 17.93617000 | 11.77288800 | 2.30948800 |
| H | 17.91708900 | 11.70318000 | 4.09146500 |
| C | 15.34493400 | 10.90203100 | 1.81884200 |
| H | 14.55614800 | 10.13225200 | 1.73927000 |
| H | 16.00207400 | 10.80219700 | 0.93085400 |
| H | 14.85181900 | 11.88821900 | 1.74957300 |
| C | 14.22842000 | 8.13837500  | 4.00120200 |
| H | 15.33047200 | 8.06445200  | 3.89551800 |
| H | 13.82740100 | 7.94002700  | 2.98315500 |
| C | 13.76796400 | 7.03138300  | 4.95957200 |
| H | 14.11928200 | 6.02357900  | 4.64066800 |
| H | 14.18960600 | 7.23707800  | 5.95887900 |
| C | 7.59604400  | 8.47196700  | 1.96885900 |
| H | 7.19750100  | 9.02890100  | 1.09248000 |
| C | 6.89286800  | 9.02588700  | 3.22655000 |
| H | 7.23744000  | 8.50284100  | 4.13798200 |
| H | 5.79436500  | 8.88711200  | 3.16237900 |
| H | 7.08041400  | 10.10467700 | 3.37755700 |
| C | 7.21307700  | 6.98749400  | 1.76345300 |
| H | 7.66165300  | 6.55250200  | 0.85160800 |
| H | 6.11328000  | 6.87864900  | 1.67107900 |
| H | 7.52398500  | 6.36343200  | 2.62221400 |
| C | 9.70344300  | 10.78566400 | 1.89358800 |

|   |             |             |             |
|---|-------------|-------------|-------------|
| H | 9.54803500  | 11.12216500 | 2.94229600  |
| C | 8.63900600  | 11.51912100 | 1.04135900  |
| H | 8.69924300  | 11.23344600 | -0.02544500 |
| H | 8.79199200  | 12.61556700 | 1.09429600  |
| H | 7.60885900  | 11.31519400 | 1.38301500  |
| C | 11.11386500 | 11.26173000 | 1.47194400  |
| H | 11.93253900 | 10.76322800 | 2.02876400  |
| H | 11.22552400 | 12.35076300 | 1.63863600  |
| H | 11.29860500 | 11.07181300 | 0.39799600  |
| C | 10.19862900 | 7.95473700  | 0.37645000  |
| H | 9.90605800  | 6.89306500  | 0.53456200  |
| C | 9.53561300  | 8.40507400  | -0.94701600 |
| H | 8.43233000  | 8.34384200  | -0.91291600 |
| H | 9.87442400  | 7.77457900  | -1.79415100 |
| H | 9.80313300  | 9.44918600  | -1.19664300 |
| C | 11.73689900 | 7.97280300  | 0.23965200  |
| H | 12.11211400 | 8.97600100  | -0.03197000 |
| H | 12.07236500 | 7.27477600  | -0.55412300 |
| H | 12.23826900 | 7.67971200  | 1.17987200  |
| C | 10.26815100 | 6.83508400  | 3.62737300  |
| H | 9.89595600  | 6.27040700  | 2.74573500  |
| H | 9.55368700  | 6.60126300  | 4.44730200  |
| C | 11.65421300 | 6.27411100  | 3.96120400  |
| H | 11.61592800 | 5.19116500  | 4.21996200  |
| H | 12.29735500 | 6.38329200  | 3.07130100  |

117

U(TREN<sup>TIPS</sup>)Cl

|    |             |             |            |
|----|-------------|-------------|------------|
| U  | 11.48948600 | 9.66547800  | 4.95327200 |
| Cl | 10.51465100 | 12.11537500 | 4.93658400 |
| Si | 9.97647400  | 9.37650200  | 8.31147900 |
| Si | 15.04610200 | 10.66798500 | 4.78370600 |
| Si | 9.57799800  | 9.13982000  | 1.80588000 |
| N  | 11.05766300 | 8.79333900  | 7.00097600 |
| N  | 13.70964300 | 9.51594200  | 4.46499600 |
| N  | 10.34378400 | 8.58807700  | 3.32769700 |
| N  | 12.24395900 | 7.11423800  | 4.94947900 |
| C  | 9.41818900  | 7.89593400  | 9.44130900 |
| H  | 10.35210200 | 7.55734300  | 9.94100600 |
| C  | 8.82108300  | 6.66370400  | 8.72465200 |



|   |             |             |             |
|---|-------------|-------------|-------------|
| H | 7.83421400  | 6.88564500  | 8.28115800  |
| H | 8.67567600  | 5.82815600  | 9.43944000  |
| H | 9.46731100  | 6.29178300  | 7.90997200  |
| C | 8.46646500  | 8.36391000  | 10.56884100 |
| H | 8.87359900  | 9.21799600  | 11.13945300 |
| H | 8.27807100  | 7.54298400  | 11.28999600 |
| H | 7.48385300  | 8.67074400  | 10.16531600 |
| C | 8.49077900  | 10.29852000 | 7.49825400  |
| H | 8.93503000  | 10.89059400 | 6.67038300  |
| C | 7.79259200  | 11.31824100 | 8.43026300  |
| H | 7.30980300  | 10.82760800 | 9.29628200  |
| H | 6.99828500  | 11.86027000 | 7.87920100  |
| H | 8.49212100  | 12.07671700 | 8.82313500  |
| C | 7.44219100  | 9.34863200  | 6.87519600  |
| H | 7.89897200  | 8.59365500  | 6.20827900  |
| H | 6.70383100  | 9.91782500  | 6.27701100  |
| H | 6.87575300  | 8.80678900  | 7.65586000  |
| C | 10.92594900 | 10.60738300 | 9.46486200  |
| H | 10.16648000 | 11.01250100 | 10.16876700 |
| C | 11.51094800 | 11.79742300 | 8.67493600  |
| H | 12.27886100 | 11.45421400 | 7.95329300  |
| H | 12.00562800 | 12.52238400 | 9.35287000  |
| H | 10.74925100 | 12.34660400 | 8.09354200  |
| C | 12.03099500 | 9.93555400  | 10.31123500 |
| H | 11.63915200 | 9.13172000  | 10.96088100 |
| H | 12.52752100 | 10.67663700 | 10.97013600 |
| H | 12.81975900 | 9.49642500  | 9.67091600  |
| C | 11.94415200 | 7.65255800  | 7.35335700  |
| H | 11.67956600 | 7.19125000  | 8.32569100  |
| H | 12.99842800 | 7.98425400  | 7.46195900  |
| C | 11.86217300 | 6.56061300  | 6.28074300  |
| H | 12.49697600 | 5.68134100  | 6.53169200  |
| H | 10.81701400 | 6.21241700  | 6.21538900  |
| C | 14.26987200 | 12.36727800 | 5.28246300  |
| H | 13.33005400 | 12.12677000 | 5.82953400  |
| C | 13.86327500 | 13.24054200 | 4.07186100  |
| H | 14.75525000 | 13.61186200 | 3.53284700  |
| H | 13.28738900 | 14.12371600 | 4.40974200  |
| H | 13.23075700 | 12.69918700 | 3.34956700  |
| C | 15.14274800 | 13.20817700 | 6.24608900  |
| H | 15.36073400 | 12.68986200 | 7.19617400  |

|   |             |             |            |
|---|-------------|-------------|------------|
| H | 14.62621900 | 14.15518700 | 6.49935400 |
| H | 16.11057200 | 13.48058100 | 5.78406400 |
| C | 16.19766700 | 10.08755800 | 6.23860200 |
| H | 16.84622100 | 10.97210100 | 6.42203000 |
| C | 15.43052700 | 9.80542900  | 7.54750100 |
| H | 14.73071400 | 10.61567000 | 7.82235300 |
| H | 16.12701700 | 9.66515500  | 8.39894100 |
| H | 14.83624500 | 8.87634200  | 7.46051100 |
| C | 17.13825100 | 8.90266200  | 5.92066500 |
| H | 16.57269000 | 7.96930700  | 5.73495500 |
| H | 17.81531300 | 8.69869100  | 6.77531000 |
| H | 17.77575800 | 9.08852900  | 5.03746900 |
| C | 16.20803600 | 10.78181400 | 3.23489200 |
| H | 16.69652900 | 9.78379900  | 3.19260100 |
| C | 17.34597500 | 11.81596300 | 3.41579900 |
| H | 16.95712800 | 12.85087800 | 3.44410300 |
| H | 18.06101700 | 11.76398000 | 2.56968200 |
| H | 17.92532500 | 11.65339300 | 4.34361500 |
| C | 15.49997600 | 10.98020800 | 1.87688300 |
| H | 14.70625800 | 10.23081800 | 1.70947600 |
| H | 16.22547300 | 10.89222200 | 1.04256200 |
| H | 15.03194100 | 11.97749400 | 1.79765200 |
| C | 14.14975000 | 8.23672100  | 3.84890400 |
| H | 15.24915700 | 8.17161500  | 3.71110100 |
| H | 13.71722100 | 8.12163000  | 2.83147200 |
| C | 13.71630600 | 7.05948300  | 4.72760900 |
| H | 14.00843600 | 6.07755500  | 4.29153400 |
| H | 14.21046100 | 7.15213800  | 5.71061200 |
| C | 7.65513800  | 9.24193600  | 1.97230000 |
| H | 7.29818100  | 9.52415100  | 0.95784100 |
| C | 7.20031300  | 10.34816300 | 2.94878300 |
| H | 7.60481300  | 10.18094900 | 3.96397200 |
| H | 6.09450800  | 10.37044100 | 3.03264000 |
| H | 7.52726800  | 11.35354100 | 2.62911700 |
| C | 6.98617200  | 7.89644900  | 2.33726500 |
| H | 7.26463000  | 7.07816800  | 1.64621800 |
| H | 5.88121000  | 7.98541600  | 2.31187800 |
| H | 7.25911000  | 7.57826700  | 3.36091900 |
| C | 10.20833400 | 10.91888400 | 1.44105700 |
| H | 9.84455100  | 11.51359000 | 2.30452000 |
| C | 9.58516900  | 11.53719600 | 0.16670100 |

|   |             |             |             |
|---|-------------|-------------|-------------|
| H | 9.94501300  | 11.03320400 | -0.75024700 |
| H | 9.86399200  | 12.60620500 | 0.07855400  |
| H | 8.48100200  | 11.48566400 | 0.16503400  |
| C | 11.74209500 | 11.07520800 | 1.40502300  |
| H | 12.24854600 | 10.65024300 | 2.29608400  |
| H | 12.02680700 | 12.14455900 | 1.35503400  |
| H | 12.18635600 | 10.57523600 | 0.52556300  |
| C | 9.96541300  | 7.85819000  | 0.39502900  |
| H | 9.74770100  | 6.86630600  | 0.84883800  |
| C | 9.04972700  | 7.97533500  | -0.84755800 |
| H | 7.97769000  | 7.89161300  | -0.59435800 |
| H | 9.27923000  | 7.17126300  | -1.57616000 |
| H | 9.19261400  | 8.93711500  | -1.37453900 |
| C | 11.44729700 | 7.83476700  | -0.04592100 |
| H | 11.69998000 | 8.73291700  | -0.63954100 |
| H | 11.65684300 | 6.95517200  | -0.68800800 |
| H | 12.14600500 | 7.79976200  | 0.81075300  |
| C | 10.13267300 | 7.15512600  | 3.67141600  |
| H | 9.55572800  | 6.60571400  | 2.90063700  |
| H | 9.53594400  | 7.05109100  | 4.60472500  |
| C | 11.48443400 | 6.45341600  | 3.84799600  |
| H | 11.37248600 | 5.36488900  | 4.05331300  |
| H | 12.06242800 | 6.56635100  | 2.91494800  |

117

U(TREN<sup>TIPS</sup>)Br

|    |             |             |            |
|----|-------------|-------------|------------|
| U  | 11.48528200 | 9.68143900  | 4.96181400 |
| Br | 10.44383900 | 12.28444400 | 4.92165000 |
| Si | 9.96253100  | 9.36732100  | 8.31721500 |
| Si | 15.04377700 | 10.68138100 | 4.77922500 |
| Si | 9.59023000  | 9.14282500  | 1.80134600 |
| N  | 11.05547000 | 8.80429100  | 7.00546300 |
| N  | 13.70049800 | 9.53267100  | 4.46439100 |
| N  | 10.34816800 | 8.60587100  | 3.33494700 |
| N  | 12.24252500 | 7.12879000  | 4.95681000 |
| C  | 9.41777300  | 7.87432900  | 9.43812100 |
| H  | 10.35365600 | 7.53820200  | 9.93576100 |
| C  | 8.82760100  | 6.64171300  | 8.71637700 |
| H  | 7.84014900  | 6.85987300  | 8.27244000 |
| H  | 8.68564000  | 5.80325100  | 9.42843900 |

|   |             |             |             |
|---|-------------|-------------|-------------|
| H | 9.47669500  | 6.27499700  | 7.90160900  |
| C | 8.46395800  | 8.33033700  | 10.56891300 |
| H | 8.86817200  | 9.18115600  | 11.14638000 |
| H | 8.27857100  | 7.50300400  | 11.28347200 |
| H | 7.48030700  | 8.63686000  | 10.16775300 |
| C | 8.46662300  | 10.27493500 | 7.50743600  |
| H | 8.90452900  | 10.87400400 | 6.68082500  |
| C | 7.76083400  | 11.28657100 | 8.44211900  |
| H | 7.28177600  | 10.78995800 | 9.30678300  |
| H | 6.96276100  | 11.82434600 | 7.89248100  |
| H | 8.45510400  | 12.04877400 | 8.83700400  |
| C | 7.42684100  | 9.31853200  | 6.88012100  |
| H | 7.89099800  | 8.56955200  | 6.21147700  |
| H | 6.68597800  | 9.88421600  | 6.28173200  |
| H | 6.86282200  | 8.76966500  | 7.65762100  |
| C | 10.90265900 | 10.59751400 | 9.47979000  |
| H | 10.14059000 | 10.99132900 | 10.18719000 |
| C | 11.48139500 | 11.79880800 | 8.70275200  |
| H | 12.23612200 | 11.46719600 | 7.96194000  |
| H | 11.98963200 | 12.50823700 | 9.38715500  |
| H | 10.71347500 | 12.36264300 | 8.14441600  |
| C | 12.01139800 | 9.92390200  | 10.32026300 |
| H | 11.62424300 | 9.11208400  | 10.96270500 |
| H | 12.50327200 | 10.66204400 | 10.98585100 |
| H | 12.80299700 | 9.49525700  | 9.67635800  |
| C | 11.95205800 | 7.67131400  | 7.35839300  |
| H | 11.69821600 | 7.21396400  | 8.33531000  |
| H | 13.00446100 | 8.01112900  | 7.45795000  |
| C | 11.87093100 | 6.57510400  | 6.29078200  |
| H | 12.51263600 | 5.70065500  | 6.54064900  |
| H | 10.82788100 | 6.21990100  | 6.23171600  |
| C | 14.28036200 | 12.39147400 | 5.25787900  |
| H | 13.33338400 | 12.16654900 | 5.79956600  |
| C | 13.89091200 | 13.25648200 | 4.03584100  |
| H | 14.78963000 | 13.61303700 | 3.49814200  |
| H | 13.32205000 | 14.14882300 | 4.36128300  |
| H | 13.25521100 | 12.71462700 | 3.31639700  |
| C | 15.15384500 | 13.23195900 | 6.22112000  |
| H | 15.35544900 | 12.72043500 | 7.17844200  |
| H | 14.64580200 | 14.18736100 | 6.45941600  |
| H | 16.12966800 | 13.48822900 | 5.76687000  |

|   |             |             |             |
|---|-------------|-------------|-------------|
| C | 16.18480000 | 10.10430500 | 6.24353400  |
| H | 16.84003100 | 10.98513400 | 6.42090200  |
| C | 15.41082800 | 9.84111800  | 7.55231600  |
| H | 14.71394900 | 10.65774100 | 7.81551700  |
| H | 16.10308400 | 9.70654900  | 8.40810400  |
| H | 14.81262900 | 8.91398000  | 7.47303100  |
| C | 17.11640200 | 8.90866900  | 5.93997800  |
| H | 16.54379400 | 7.97911800  | 5.75646800  |
| H | 17.78573000 | 8.70440400  | 6.80058700  |
| H | 17.76148800 | 9.08291300  | 5.05998200  |
| C | 16.21523000 | 10.77196900 | 3.23561500  |
| H | 16.69938300 | 9.77147500  | 3.20631300  |
| C | 17.35766100 | 11.80174600 | 3.41457600  |
| H | 16.97500700 | 12.83920700 | 3.42742800  |
| H | 18.07941600 | 11.73552500 | 2.57520400  |
| H | 17.92814800 | 11.64663200 | 4.34908800  |
| C | 15.51826800 | 10.96115400 | 1.87065700  |
| H | 14.72504900 | 10.21152300 | 1.70216200  |
| H | 16.25038100 | 10.86590100 | 1.04294800  |
| H | 15.05207500 | 11.95830100 | 1.78037200  |
| C | 14.13956100 | 8.25389600  | 3.84560100  |
| H | 15.23824800 | 8.19110300  | 3.70252100  |
| H | 13.70184100 | 8.13881600  | 2.83052300  |
| C | 13.71316300 | 7.07584000  | 4.72583800  |
| H | 14.00421300 | 6.09471000  | 4.28745500  |
| H | 14.21290100 | 7.16861200  | 5.70596700  |
| C | 7.67002000  | 9.27021200  | 1.97771900  |
| H | 7.30918200  | 9.54462600  | 0.96249700  |
| C | 7.23796900  | 10.39391200 | 2.94472200  |
| H | 7.65063200  | 10.23438600 | 3.95792900  |
| H | 6.13334400  | 10.43069200 | 3.03801300  |
| H | 7.57527300  | 11.39125300 | 2.61100100  |
| C | 6.98725700  | 7.93795200  | 2.36462600  |
| H | 7.25507700  | 7.10621400  | 1.68548000  |
| H | 5.88330400  | 8.03867100  | 2.34079500  |
| H | 7.25929600  | 7.63299100  | 3.39253600  |
| C | 10.24326700 | 10.90527300 | 1.40566200  |
| H | 9.88782500  | 11.51709600 | 2.26048900  |
| C | 9.62756100  | 11.51458000 | 0.12364800  |
| H | 9.97744800  | 10.99313900 | -0.78742000 |
| H | 9.92261400  | 12.57789700 | 0.02079700  |

|   |             |             |             |
|---|-------------|-------------|-------------|
| H | 8.52267100  | 11.48018900 | 0.12556700  |
| C | 11.77907900 | 11.03899600 | 1.36944100  |
| H | 12.27853500 | 10.61054100 | 2.26251000  |
| H | 12.07964800 | 12.10359900 | 1.31246800  |
| H | 12.21496200 | 10.52705400 | 0.49267900  |
| C | 9.96070700  | 7.83467200  | 0.40964400  |
| H | 9.74341300  | 6.85010000  | 0.87909800  |
| C | 9.03294900  | 7.93939800  | -0.82522300 |
| H | 7.96328800  | 7.86310300  | -0.56009800 |
| H | 9.25220300  | 7.12530700  | -1.54577900 |
| H | 9.17423900  | 8.89400800  | -1.36549800 |
| C | 11.43784000 | 7.79853100  | -0.04654400 |
| H | 11.68714700 | 8.68467000  | -0.65938900 |
| H | 11.63736200 | 6.90661100  | -0.67463700 |
| H | 12.14596200 | 7.77673000  | 0.80277000  |
| C | 10.12691100 | 7.17718600  | 3.69151700  |
| H | 9.53656900  | 6.62871600  | 2.93067300  |
| H | 9.53850600  | 7.08557600  | 4.63142100  |
| C | 11.47493800 | 6.46698100  | 3.86146200  |
| H | 11.35817400 | 5.38004600  | 4.07168300  |
| H | 12.04836000 | 6.57328800  | 2.92485600  |

117

U(TREN<sup>TIPS</sup>)I

|    |             |             |             |
|----|-------------|-------------|-------------|
| U  | 11.43158800 | 9.71804500  | 4.95834200  |
| I  | 10.38736200 | 12.63281300 | 4.86343300  |
| Si | 10.01947700 | 9.31601900  | 8.32703900  |
| Si | 15.04663200 | 10.76800700 | 4.81107300  |
| Si | 9.53381100  | 9.10919300  | 1.80159300  |
| N  | 11.10707000 | 8.77468700  | 6.99853700  |
| N  | 13.65689100 | 9.66444100  | 4.51084600  |
| N  | 10.25652200 | 8.62940700  | 3.37837600  |
| N  | 12.20665000 | 7.17049000  | 4.94125300  |
| C  | 9.39464500  | 7.80125400  | 9.37386700  |
| H  | 10.30382400 | 7.40199700  | 9.87287700  |
| C  | 8.76279700  | 6.63190400  | 8.58626600  |
| H  | 7.80291300  | 6.92314700  | 8.12528300  |
| H  | 8.55617900  | 5.77352000  | 9.25750900  |
| H  | 9.41612000  | 6.26521600  | 7.77471900  |
| C  | 8.44072800  | 8.25356200  | 10.50636200 |

|   |             |             |             |
|---|-------------|-------------|-------------|
| H | 8.88175700  | 9.04414800  | 11.14014700 |
| H | 8.18862300  | 7.40121800  | 11.16929400 |
| H | 7.48739800  | 8.64204900  | 10.10299300 |
| C | 8.57678200  | 10.31319200 | 7.53228700  |
| H | 9.05344900  | 10.90270000 | 6.71814600  |
| C | 7.92020300  | 11.35277500 | 8.47256600  |
| H | 7.42699000  | 10.87554200 | 9.34038600  |
| H | 7.14200300  | 11.92281100 | 7.92725500  |
| H | 8.64677100  | 12.08756000 | 8.86113000  |
| C | 7.48585400  | 9.43684000  | 6.87382100  |
| H | 7.90479700  | 8.66757300  | 6.19851600  |
| H | 6.79493200  | 10.06294600 | 6.27582500  |
| H | 6.87282900  | 8.91550700  | 7.63283300  |
| C | 10.97920100 | 10.46315800 | 9.55549800  |
| H | 10.21116500 | 10.86619400 | 10.25119600 |
| C | 11.62628300 | 11.66130600 | 8.82902200  |
| H | 12.39971700 | 11.31764200 | 8.11420500  |
| H | 12.12757600 | 12.34091800 | 9.54770600  |
| H | 10.89812500 | 12.26112300 | 8.25418700  |
| C | 12.03671500 | 9.72489100  | 10.40836000 |
| H | 11.60124100 | 8.91419900  | 11.02124900 |
| H | 12.53866300 | 10.42708700 | 11.10465400 |
| H | 12.82851300 | 9.28070500  | 9.77534800  |
| C | 11.98482100 | 7.63205600  | 7.35688200  |
| H | 11.71068000 | 7.15678200  | 8.32026400  |
| H | 13.03891500 | 7.95901800  | 7.47942800  |
| C | 11.89928600 | 6.56351100  | 6.26635400  |
| H | 12.57268000 | 5.70011800  | 6.46565500  |
| H | 10.86505100 | 6.18114700  | 6.23004800  |
| C | 14.35963600 | 12.50902500 | 5.28137700  |
| H | 13.40800000 | 12.32472300 | 5.82872300  |
| C | 13.99714200 | 13.37451500 | 4.05149100  |
| H | 14.90412200 | 13.68250200 | 3.49851400  |
| H | 13.47406800 | 14.29649000 | 4.37124100  |
| H | 13.32402400 | 12.85402700 | 3.34997300  |
| C | 15.27464300 | 13.32511800 | 6.22742300  |
| H | 15.46352500 | 12.81940300 | 7.19069800  |
| H | 14.80673600 | 14.30295000 | 6.45670000  |
| H | 16.25656500 | 13.53714700 | 5.76396300  |
| C | 16.16719700 | 10.14675200 | 6.26954300  |
| H | 16.86829600 | 10.99360100 | 6.43658800  |

|   |             |             |             |
|---|-------------|-------------|-------------|
| C | 15.38322200 | 9.93817600  | 7.58133500  |
| H | 14.78419600 | 10.82153300 | 7.86705900  |
| H | 16.06504700 | 9.71206100  | 8.42611500  |
| H | 14.68198500 | 9.08776500  | 7.49090600  |
| C | 17.03315700 | 8.90270100  | 5.96633900  |
| H | 16.41417900 | 8.00256500  | 5.78622100  |
| H | 17.69434300 | 8.66602000  | 6.82479900  |
| H | 17.68292000 | 9.04229000  | 5.08350100  |
| C | 16.21028100 | 10.80597700 | 3.25631500  |
| H | 16.66561100 | 9.79204300  | 3.22675600  |
| C | 17.38532800 | 11.80023100 | 3.42607800  |
| H | 17.03607900 | 12.84925300 | 3.43640900  |
| H | 18.10062800 | 11.70742700 | 2.58368800  |
| H | 17.95485100 | 11.63042300 | 4.35859900  |
| C | 15.51069100 | 11.01398400 | 1.89528400  |
| H | 14.68922700 | 10.29318600 | 1.73623100  |
| H | 16.23227800 | 10.88810300 | 1.06246400  |
| H | 15.08002100 | 12.02667500 | 1.80386900  |
| C | 14.04047400 | 8.39899100  | 3.81838100  |
| H | 15.12647200 | 8.34390900  | 3.60384100  |
| H | 13.54631700 | 8.32418800  | 2.82452000  |
| C | 13.67110800 | 7.17691400  | 4.66479500  |
| H | 13.97922900 | 6.22465500  | 4.17766500  |
| H | 14.19806000 | 7.24679200  | 5.63202200  |
| C | 7.60897100  | 9.22262200  | 1.94048600  |
| H | 7.25645500  | 9.40033800  | 0.90125800  |
| C | 7.14642000  | 10.41750800 | 2.80337100  |
| H | 7.55940200  | 10.36135100 | 3.82803200  |
| H | 6.04109500  | 10.43388300 | 2.89223200  |
| H | 7.45755200  | 11.38946900 | 2.38122600  |
| C | 6.94131000  | 7.91922200  | 2.43761900  |
| H | 7.22771100  | 7.03294800  | 1.83977600  |
| H | 5.83664000  | 8.00211200  | 2.39316900  |
| H | 7.20552900  | 7.71356000  | 3.49189700  |
| C | 10.18087400 | 10.85602100 | 1.33219100  |
| H | 9.77434200  | 11.51163700 | 2.12974600  |
| C | 9.60565800  | 11.36514700 | -0.01196900 |
| H | 10.01299200 | 10.80043800 | -0.87216000 |
| H | 9.87259000  | 12.42922300 | -0.16769000 |
| H | 8.50331400  | 11.29415800 | -0.05629500 |
| C | 11.71269700 | 11.03555100 | 1.35195500  |



|   |             |             |             |
|---|-------------|-------------|-------------|
| H | 12.18289700 | 10.70405000 | 2.30054000  |
| H | 11.98099700 | 12.10313200 | 1.22807200  |
| H | 12.20692600 | 10.47284500 | 0.53980400  |
| C | 9.95542600  | 7.74856500  | 0.47562200  |
| H | 9.82023500  | 6.77619600  | 0.99682300  |
| C | 8.99260900  | 7.72901200  | -0.73670800 |
| H | 7.94071800  | 7.57295200  | -0.43822000 |
| H | 9.26271100  | 6.91000000  | -1.43380600 |
| H | 9.03853600  | 8.67200100  | -1.31194900 |
| C | 11.41960700 | 7.79041500  | -0.02008700 |
| H | 11.59617600 | 8.66591800  | -0.67191100 |
| H | 11.66086400 | 6.88873900  | -0.61871200 |
| H | 12.14860100 | 7.84683600  | 0.80965200  |
| C | 10.06020800 | 7.19769400  | 3.74287200  |
| H | 9.44064100  | 6.64661300  | 3.00862400  |
| H | 9.51611000  | 7.10459000  | 4.70743100  |
| C | 11.42438700 | 6.50785500  | 3.85615600  |
| H | 11.33714500 | 5.41597700  | 4.05293500  |
| H | 11.96597000 | 6.63878500  | 2.90366400  |

117

Np(TREN<sup>TIPS</sup>)F

|    |            |             |            |
|----|------------|-------------|------------|
| Np | 8.01525100 | 6.05822400  | 5.09525300 |
| F  | 8.67764700 | 4.05475800  | 5.25797800 |
| Si | 4.50177200 | 4.95529000  | 5.26421500 |
| Si | 9.98778500 | 6.66608800  | 8.19679500 |
| Si | 9.33758800 | 5.98610300  | 1.68804900 |
| N  | 7.26842500 | 8.56480400  | 4.94174900 |
| N  | 5.77948000 | 6.17908500  | 5.48192800 |
| N  | 9.13633600 | 7.20002100  | 6.72209000 |
| N  | 8.34081200 | 6.76427000  | 2.95509400 |
| C  | 5.78086500 | 8.60811000  | 5.03946200 |
| H  | 5.36770000 | 8.43359900  | 4.03105400 |
| H  | 5.44694000 | 9.61551500  | 5.37749400 |
| C  | 5.29043100 | 7.49142700  | 5.96906000 |
| H  | 5.64412700 | 7.68252700  | 7.00596900 |
| H  | 4.18393000 | 7.55751800  | 6.02436900 |
| C  | 7.90443100 | 9.27490200  | 6.08788400 |
| H  | 7.23979600 | 9.16849100  | 6.96191000 |
| H  | 7.99578200 | 10.36149100 | 5.86164400 |

|   |            |             |            |
|---|------------|-------------|------------|
| C | 9.26270700 | 8.65335100  | 6.43935700 |
| H | 9.98949400 | 8.84309900  | 5.61733000 |
| H | 9.65666800 | 9.22463000  | 7.30607000 |
| C | 7.76312800 | 9.08187600  | 3.63484600 |
| H | 8.82805300 | 9.34430200  | 3.76286900 |
| H | 7.21616300 | 10.01127200 | 3.35585600 |
| C | 7.65133900 | 8.00883300  | 2.54407000 |
| H | 6.57960900 | 7.80744400  | 2.32897100 |
| H | 8.05945100 | 8.45391600  | 1.61191200 |
| C | 3.21593100 | 5.44970800  | 3.88676200 |
| H | 2.64104200 | 4.51062300  | 3.72966800 |
| C | 3.88066800 | 5.80852700  | 2.54070600 |
| H | 3.12341000 | 5.94235300  | 1.74150700 |
| H | 4.59073300 | 5.03516600  | 2.19680300 |
| H | 4.44684000 | 6.75625600  | 2.61698100 |
| C | 2.18453300 | 6.53783800  | 4.26586000 |
| H | 2.65921400 | 7.53106500  | 4.37926400 |
| H | 1.64962900 | 6.31289000  | 5.20631300 |
| H | 1.41838300 | 6.64307700  | 3.47055600 |
| C | 3.47036100 | 4.78611500  | 6.89718800 |
| H | 2.93067500 | 5.75583100  | 6.97065600 |
| C | 4.30715300 | 4.65210600  | 8.18800100 |
| H | 3.65829200 | 4.71624000  | 9.08530300 |
| H | 5.06929300 | 5.44801500  | 8.26872000 |
| H | 4.83544400 | 3.68339000  | 8.23641100 |
| C | 2.39175000 | 3.68025400  | 6.81841300 |
| H | 2.84547600 | 2.67285100  | 6.76297100 |
| H | 1.73286700 | 3.79599600  | 5.93796500 |
| H | 1.74429000 | 3.69367000  | 7.71873800 |
| C | 5.35900100 | 3.31248000  | 4.71086400 |
| H | 6.22614400 | 3.62884700  | 4.08779600 |
| C | 4.47688600 | 2.40594600  | 3.81800100 |
| H | 5.03620300 | 1.49437700  | 3.52733100 |
| H | 4.15349800 | 2.90225800  | 2.88645100 |
| H | 3.56742400 | 2.07086000  | 4.35190900 |
| C | 5.92636300 | 2.47509400  | 5.88233100 |
| H | 5.10964300 | 2.04685400  | 6.49278200 |
| H | 6.58186500 | 3.05851900  | 6.54927800 |
| H | 6.52900400 | 1.62999500  | 5.49587600 |
| C | 9.78234900 | 4.75220300  | 8.33382100 |
| H | 9.97366900 | 4.37415600  | 7.30798100 |

|   |             |            |             |
|---|-------------|------------|-------------|
| C | 8.35475200  | 4.29844100 | 8.71719600  |
| H | 8.24793700  | 3.20236500 | 8.59679800  |
| H | 7.56923500  | 4.77219800 | 8.09846600  |
| H | 8.12373500  | 4.53608100 | 9.77295200  |
| C | 10.81162600 | 4.06517600 | 9.26383400  |
| H | 10.70560200 | 4.39424900 | 10.31459100 |
| H | 11.85583700 | 4.25736100 | 8.95875100  |
| H | 10.66432500 | 2.96651000 | 9.25171500  |
| C | 9.28922400  | 7.65018100 | 9.71677400  |
| H | 9.58772700  | 8.70273000 | 9.51535100  |
| C | 9.94498500  | 7.25440100 | 11.06064100 |
| H | 9.61104100  | 7.92687100 | 11.87698900 |
| H | 11.04899500 | 7.30289900 | 11.02605100 |
| H | 9.66638700  | 6.22573400 | 11.35721600 |
| C | 7.75012800  | 7.64139500 | 9.84560400  |
| H | 7.37230000  | 6.64749100 | 10.14591100 |
| H | 7.25486300  | 7.90326400 | 8.89298600  |
| H | 7.41209700  | 8.36536700 | 10.61482000 |
| C | 11.89203800 | 7.03554900 | 8.13871800  |
| H | 12.28710100 | 6.51017600 | 9.03558300  |
| C | 12.30733100 | 8.51892100 | 8.27468500  |
| H | 13.40943300 | 8.60932000 | 8.36099400  |
| H | 11.86994000 | 9.00535600 | 9.16620900  |
| H | 12.00869500 | 9.10967200 | 7.38835200  |
| C | 12.57074700 | 6.40916900 | 6.90125500  |
| H | 12.23364800 | 6.90427600 | 5.97136400  |
| H | 12.35059600 | 5.33104000 | 6.79584000  |
| H | 13.67318500 | 6.51981000 | 6.95089800  |
| C | 8.26399400  | 5.19678400 | 0.28396400  |
| H | 9.00009500  | 4.74720000 | -0.41805200 |
| C | 7.36792600  | 4.05524500 | 0.81084700  |
| H | 6.64119400  | 4.43248300 | 1.55479800  |
| H | 7.94929000  | 3.25136900 | 1.29769300  |
| H | 6.78568400  | 3.59180200 | -0.01128900 |
| C | 7.42312900  | 6.21059300 | -0.52525400 |
| H | 6.90013500  | 5.70819400 | -1.36434300 |
| H | 8.03835200  | 7.01965200 | -0.96164000 |
| H | 6.64399300  | 6.68202300 | 0.10246800  |
| C | 10.45346800 | 7.33585100 | 0.84715500  |
| H | 9.72920300  | 8.01773100 | 0.35028900  |
| C | 11.27595500 | 8.19299100 | 1.83470300  |

|   |             |            |             |
|---|-------------|------------|-------------|
| H | 12.07680200 | 7.60094700 | 2.31402600  |
| H | 10.65161800 | 8.61123100 | 2.64474200  |
| H | 11.76484300 | 9.04084200 | 1.31306800  |
| C | 11.36940700 | 6.78310600 | -0.27009100 |
| H | 11.86454000 | 7.61118000 | -0.81687300 |
| H | 10.81739700 | 6.18072500 | -1.01426400 |
| H | 12.17339700 | 6.14695100 | 0.14460000  |
| C | 10.32465100 | 4.54821200 | 2.51371300  |
| H | 9.55774100  | 3.95773700 | 3.05721300  |
| C | 10.99598200 | 3.58269300 | 1.50750600  |
| H | 11.78624100 | 4.08470000 | 0.91946500  |
| H | 10.27788600 | 3.14414700 | 0.79161500  |
| H | 11.47578600 | 2.74099700 | 2.04594700  |
| C | 11.36038000 | 5.00676000 | 3.56377000  |
| H | 11.72656900 | 4.14703200 | 4.15754800  |
| H | 10.95417400 | 5.74478200 | 4.28279000  |
| H | 12.23921600 | 5.47843200 | 3.08556100  |

117

Np(TREN<sup>TIPS</sup>)Cl

|    |             |             |            |
|----|-------------|-------------|------------|
| Np | 8.11120800  | 5.96432600  | 5.06041600 |
| Cl | 9.07676900  | 3.52681700  | 5.29714500 |
| Si | 4.57654700  | 4.86536700  | 5.22697400 |
| Si | 9.92953300  | 6.52988900  | 8.30558000 |
| Si | 9.37840100  | 6.16639600  | 1.61924100 |
| N  | 7.32084300  | 8.47875800  | 5.04637500 |
| N  | 5.89817200  | 6.03915700  | 5.53171000 |
| N  | 9.19380900  | 7.00687800  | 6.74188600 |
| N  | 8.36052200  | 6.80277400  | 2.95888700 |
| C  | 5.84875700  | 8.50100100  | 5.27590800 |
| H  | 5.35147300  | 8.40609100  | 4.29520700 |
| H  | 5.54023800  | 9.47354800  | 5.72112500 |
| C  | 5.43997800  | 7.31071300  | 6.14978800 |
| H  | 5.87254600  | 7.42844700  | 7.16667200 |
| H  | 4.34034200  | 7.35743000  | 6.29116000 |
| C  | 8.07818400  | 9.13955800  | 6.15004300 |
| H  | 7.49631000  | 9.03935500  | 7.08192000 |
| H  | 8.20212000  | 10.22483600 | 5.93652300 |
| C  | 9.42107400  | 8.42110700  | 6.33761500 |
| H  | 10.00770300 | 8.48267000  | 5.39196100 |

|   |             |            |            |
|---|-------------|------------|------------|
| H | 10.02360900 | 8.98714200 | 7.07532800 |
| C | 7.68859700  | 9.05801300 | 3.72326300 |
| H | 8.74342200  | 9.37853300 | 3.77916100 |
| H | 7.07304000  | 9.96112700 | 3.51040100 |
| C | 7.55902700  | 8.00353400 | 2.62017900 |
| H | 6.48988200  | 7.73626700 | 2.48347000 |
| H | 7.86703800  | 8.48192600 | 1.66836600 |
| C | 3.37889000  | 5.45565900 | 3.81221000 |
| H | 2.75534000  | 4.55521200 | 3.61975700 |
| C | 4.10728100  | 5.79538500 | 2.49605700 |
| H | 3.38762600  | 5.95220500 | 1.66707200 |
| H | 4.81157000  | 5.00578500 | 2.17887800 |
| H | 4.69260400  | 6.72830300 | 2.59967700 |
| C | 2.40601800  | 6.59996400 | 4.17905000 |
| H | 2.94214700  | 7.55158300 | 4.35837000 |
| H | 1.80451700  | 6.37989600 | 5.07941800 |
| H | 1.69456900  | 6.78947500 | 3.34934000 |
| C | 3.44368700  | 4.70493700 | 6.79389900 |
| H | 2.94317200  | 5.69529200 | 6.86458400 |
| C | 4.17163800  | 4.48736600 | 8.13764200 |
| H | 3.45302000  | 4.53438200 | 8.98122400 |
| H | 4.94732500  | 5.25222500 | 8.31650500 |
| H | 4.66658900  | 3.50142100 | 8.18516600 |
| C | 2.31682900  | 3.65963800 | 6.60568000 |
| H | 2.71965000  | 2.63193300 | 6.53975100 |
| H | 1.71599400  | 3.84015500 | 5.69500300 |
| H | 1.61911000  | 3.67765600 | 7.46749900 |
| C | 5.37053700  | 3.18982200 | 4.68040800 |
| H | 6.30363800  | 3.45733000 | 4.13460000 |
| C | 4.50076200  | 2.36243500 | 3.70196600 |
| H | 5.02715300  | 1.42814300 | 3.42304800 |
| H | 4.26943800  | 2.89940300 | 2.76529300 |
| H | 3.53974300  | 2.06655600 | 4.16411500 |
| C | 5.79392100  | 2.29057700 | 5.86625800 |
| H | 4.91017600  | 1.91216800 | 6.41347600 |
| H | 6.44666600  | 2.81275900 | 6.58435900 |
| H | 6.35851300  | 1.41175300 | 5.49887100 |
| C | 9.33610600  | 4.75354200 | 8.73353100 |
| H | 9.73990500  | 4.13831600 | 7.90326900 |
| C | 7.80772100  | 4.55165000 | 8.72786800 |
| H | 7.55420100  | 3.47445300 | 8.78020900 |

|   |             |            |             |
|---|-------------|------------|-------------|
| H | 7.32585500  | 4.95309600 | 7.81534200  |
| H | 7.32317500  | 5.04484800 | 9.58999700  |
| C | 9.94048300  | 4.20650000 | 10.04881400 |
| H | 9.53732500  | 4.73342000 | 10.93460200 |
| H | 11.04203100 | 4.29381300 | 10.08055900 |
| H | 9.69223400  | 3.13328300 | 10.17144300 |
| C | 9.45440500  | 7.87046400 | 9.63287100  |
| H | 9.62595900  | 8.84581500 | 9.12631500  |
| C | 10.35236400 | 7.86968000 | 10.89340100 |
| H | 10.06015100 | 8.68933400 | 11.58106000 |
| H | 11.42084000 | 8.00983800 | 10.65106900 |
| H | 10.26120200 | 6.92460900 | 11.46031300 |
| C | 7.96575400  | 7.83693600 | 10.04940400 |
| H | 7.75044400  | 6.96002100 | 10.68760700 |
| H | 7.28313800  | 7.78605400 | 9.18090900  |
| H | 7.69712300  | 8.73787700 | 10.63763600 |
| C | 11.86348900 | 6.47728500 | 8.22192200  |
| H | 12.17884900 | 6.29571400 | 9.27294400  |
| C | 12.51569800 | 7.80628200 | 7.77426700  |
| H | 13.61972500 | 7.75154800 | 7.86249700  |
| H | 12.18216700 | 8.67333800 | 8.37601300  |
| H | 12.28985500 | 8.02646600 | 6.71385700  |
| C | 12.40349800 | 5.30783100 | 7.36959900  |
| H | 12.05723000 | 5.37426800 | 6.32211800  |
| H | 12.08597700 | 4.32322200 | 7.75602300  |
| H | 13.51261800 | 5.31418700 | 7.35200900  |
| C | 8.32977000  | 5.11031700 | 0.38601000  |
| H | 9.05824000  | 4.73431100 | -0.36446500 |
| C | 7.69231600  | 3.88508600 | 1.07435400  |
| H | 6.96711600  | 4.20094100 | 1.84872500  |
| H | 8.43840400  | 3.23747400 | 1.56932100  |
| H | 7.13910600  | 3.25967000 | 0.34487600  |
| C | 7.25780800  | 5.92225600 | -0.37516800 |
| H | 6.71299800  | 5.27961200 | -1.09622700 |
| H | 7.69158400  | 6.76188600 | -0.94960100 |
| H | 6.50327600  | 6.34299600 | 0.31600100  |
| C | 10.11968000 | 7.63946100 | 0.59198200  |
| H | 9.23472300  | 8.14038000 | 0.14294900  |
| C | 10.87703700 | 8.70707400 | 1.41290500  |
| H | 11.82085600 | 8.30681500 | 1.82542500  |
| H | 10.28399300 | 9.08465200 | 2.26490500  |

|   |             |            |             |
|---|-------------|------------|-------------|
| H | 11.14202900 | 9.57803100 | 0.77948600  |
| C | 10.99571900 | 7.16346800 | -0.59178400 |
| H | 11.27716600 | 8.01959300 | -1.23792000 |
| H | 10.48094300 | 6.42383800 | -1.23119600 |
| H | 11.93705300 | 6.70289200 | -0.23939000 |
| C | 10.70384100 | 5.00902000 | 2.39835600  |
| H | 10.12059500 | 4.32613100 | 3.05226000  |
| C | 11.44832000 | 4.09866900 | 1.39008900  |
| H | 12.10507900 | 4.67703900 | 0.71374900  |
| H | 10.76106400 | 3.50541300 | 0.76013000  |
| H | 12.09467200 | 3.38086000 | 1.93316400  |
| C | 11.72515200 | 5.72932400 | 3.30741900  |
| H | 12.32533500 | 4.99470600 | 3.87861100  |
| H | 11.24396200 | 6.40337900 | 4.04289200  |
| H | 12.43167800 | 6.34283700 | 2.71789600  |

117

Np(TREN<sup>TIPS</sup>)Br

|    |             |             |            |
|----|-------------|-------------|------------|
| Np | 8.09296000  | 5.94389200  | 5.02549200 |
| Br | 9.12983700  | 3.35276700  | 5.21648700 |
| Si | 4.54908400  | 4.86028900  | 5.22462400 |
| Si | 9.92476300  | 6.44999700  | 8.27989500 |
| Si | 9.40002000  | 6.23460200  | 1.62439600 |
| N  | 7.32178600  | 8.46550400  | 5.06227500 |
| N  | 5.88675800  | 6.02303600  | 5.52289000 |
| N  | 9.18803400  | 6.93863400  | 6.71917800 |
| N  | 8.33803600  | 6.83444400  | 2.94664400 |
| C  | 5.85373700  | 8.49313500  | 5.31123000 |
| H  | 5.34467100  | 8.42322900  | 4.33442800 |
| H  | 5.55706800  | 9.45792300  | 5.78061200 |
| C  | 5.44425700  | 7.28916300  | 6.16460100 |
| H  | 5.88475100  | 7.38542900  | 7.18033700 |
| H  | 4.34609000  | 7.34209000  | 6.31275600 |
| C  | 8.10383600  | 9.09628400  | 6.16639700 |
| H  | 7.53529600  | 8.98904400  | 7.10561100 |
| H  | 8.24250400  | 10.18268500 | 5.96922400 |
| C  | 9.43614200  | 8.34955200  | 6.31443600 |
| H  | 9.99309200  | 8.40137600  | 5.34977600 |
| H  | 10.07606900 | 8.89650800  | 7.03419100 |
| C  | 7.67221400  | 9.07121900  | 3.74621100 |

|   |            |            |            |
|---|------------|------------|------------|
| H | 8.72793400 | 9.39039000 | 3.79330900 |
| H | 7.05344700 | 9.97765500 | 3.55897900 |
| C | 7.52776500 | 8.03352800 | 2.63018400 |
| H | 6.45718600 | 7.76449100 | 2.50823100 |
| H | 7.81818800 | 8.52241100 | 1.67887500 |
| C | 3.41062400 | 5.43577600 | 3.75811800 |
| H | 2.74089500 | 4.56415000 | 3.58929100 |
| C | 4.19201100 | 5.67293100 | 2.44982600 |
| H | 3.50541500 | 5.87303900 | 1.60221700 |
| H | 4.82514500 | 4.81318100 | 2.16674800 |
| H | 4.86047800 | 6.54893100 | 2.54366000 |
| C | 2.50035400 | 6.64943300 | 4.05409600 |
| H | 3.08828500 | 7.57186700 | 4.22425300 |
| H | 1.85731600 | 6.49502500 | 4.93934900 |
| H | 1.82975600 | 6.85500100 | 3.19484900 |
| C | 3.37556300 | 4.77996300 | 6.76853500 |
| H | 2.88690400 | 5.77836500 | 6.78955900 |
| C | 4.06729300 | 4.60162300 | 8.13740500 |
| H | 3.33017300 | 4.69485400 | 8.96092800 |
| H | 4.85421600 | 5.35732900 | 8.30711900 |
| H | 4.54056000 | 3.60857900 | 8.23399200 |
| C | 2.23745500 | 3.74467200 | 6.59256200 |
| H | 2.62379200 | 2.70860000 | 6.58890300 |
| H | 1.66930400 | 3.89114300 | 5.65528700 |
| H | 1.51305000 | 3.81477100 | 7.42933700 |
| C | 5.31326700 | 3.14839900 | 4.76043600 |
| H | 6.25844600 | 3.37216700 | 4.21604800 |
| C | 4.43875100 | 2.29747600 | 3.80731100 |
| H | 4.94808000 | 1.34087600 | 3.57649500 |
| H | 4.23356700 | 2.79942300 | 2.84578900 |
| H | 3.46468600 | 2.04324800 | 4.26617600 |
| C | 5.70311700 | 2.29673100 | 5.99184700 |
| H | 4.80358400 | 1.93353300 | 6.52392400 |
| H | 6.32652600 | 2.85037600 | 6.71292700 |
| H | 6.28412100 | 1.40830700 | 5.67735900 |
| C | 9.27596500 | 4.70322600 | 8.74153300 |
| H | 9.67424100 | 4.05566400 | 7.93358300 |
| C | 7.74270100 | 4.54615700 | 8.71918700 |
| H | 7.45672600 | 3.48012100 | 8.81584900 |
| H | 7.28729000 | 4.92026000 | 7.78155600 |
| H | 7.25997500 | 5.09194900 | 9.54991500 |



|   |             |            |             |
|---|-------------|------------|-------------|
| C | 9.84871600  | 4.17585900 | 10.07870100 |
| H | 9.45165500  | 4.73890200 | 10.94482500 |
| H | 10.95209000 | 4.23190500 | 10.12044700 |
| H | 9.56787300  | 3.11412200 | 10.22770700 |
| C | 9.50503800  | 7.81735300 | 9.60034300  |
| H | 9.67183700  | 8.78498600 | 9.07810300  |
| C | 10.43800300 | 7.82314800 | 10.83528700 |
| H | 10.16571100 | 8.64776800 | 11.52510200 |
| H | 11.49951000 | 7.96040900 | 10.56251400 |
| H | 10.36155600 | 6.88185200 | 11.41030200 |
| C | 8.02847300  | 7.80416600 | 10.05975800 |
| H | 7.82340800  | 6.93888700 | 10.71716600 |
| H | 7.32046800  | 7.74695600 | 9.21218000  |
| H | 7.78563500  | 8.71614700 | 10.64215000 |
| C | 11.85457400 | 6.33220600 | 8.17179400  |
| H | 12.17851300 | 6.17654700 | 9.22423600  |
| C | 12.53926400 | 7.62482300 | 7.67019500  |
| H | 13.64231100 | 7.54098600 | 7.74647600  |
| H | 12.23870100 | 8.52134100 | 8.24552900  |
| H | 12.30528000 | 7.81404700 | 6.60563900  |
| C | 12.34722700 | 5.11848500 | 7.35253300  |
| H | 11.98790100 | 5.15819600 | 6.30809900  |
| H | 12.00648100 | 4.15722100 | 7.77624000  |
| H | 13.45571100 | 5.09187500 | 7.32109000  |
| C | 8.42220700  | 5.04696100 | 0.45519000  |
| H | 9.16079600  | 4.67105700 | -0.28604900 |
| C | 7.86528800  | 3.82635600 | 1.21875200  |
| H | 7.14539300  | 4.14135300 | 1.99936800  |
| H | 8.65415900  | 3.23973700 | 1.72273500  |
| H | 7.32427900  | 3.14133200 | 0.53477500  |
| C | 7.29445800  | 5.75605600 | -0.32877800 |
| H | 6.77448900  | 5.04534100 | -1.00269900 |
| H | 7.67136000  | 6.58508800 | -0.95600400 |
| H | 6.52906000  | 6.17209200 | 0.35343500  |
| C | 10.01811000 | 7.71855500 | 0.53140300  |
| H | 9.09020700  | 8.16962700 | 0.11783600  |
| C | 10.76726000 | 8.83738600 | 1.28923000  |
| H | 11.75273500 | 8.49196200 | 1.64940700  |
| H | 10.20799500 | 9.20071800 | 2.17004700  |
| H | 10.94922600 | 9.70854000 | 0.62761700  |
| C | 10.85065200 | 7.25229200 | -0.68704700 |

|   |             |            |             |
|---|-------------|------------|-------------|
| H | 11.08325800 | 8.10953400 | -1.35093500 |
| H | 10.32284000 | 6.49755600 | -1.29769800 |
| H | 11.81637800 | 6.81374300 | -0.37593300 |
| C | 10.82040100 | 5.22718400 | 2.44386700  |
| H | 10.29517700 | 4.52186100 | 3.12414200  |
| C | 11.63138700 | 4.34275700 | 1.46605500  |
| H | 12.25545900 | 4.94654900 | 0.78068700  |
| H | 10.98586900 | 3.69439900 | 0.84734800  |
| H | 12.31795800 | 3.68038300 | 2.02971500  |
| C | 11.78325200 | 6.05584000 | 3.32510800  |
| H | 12.44079400 | 5.38831400 | 3.91518900  |
| H | 11.25386000 | 6.71254800 | 4.04293300  |
| H | 12.44090300 | 6.70316800 | 2.71534700  |

117

Np(TREN<sup>TIPS</sup>)I

|    |             |             |            |
|----|-------------|-------------|------------|
| Np | 8.12924500  | 5.89901500  | 5.00405500 |
| I  | 9.26300500  | 3.04294700  | 5.25442800 |
| Si | 4.56777600  | 4.82690800  | 5.22771000 |
| Si | 9.92447300  | 6.45307200  | 8.29619600 |
| Si | 9.39231700  | 6.25213600  | 1.58543400 |
| N  | 7.34319600  | 8.42368400  | 5.06416100 |
| N  | 5.92858900  | 5.96982400  | 5.52513800 |
| N  | 9.20922900  | 6.88767200  | 6.70535900 |
| N  | 8.33784500  | 6.81455500  | 2.93237900 |
| C  | 5.88072000  | 8.44186300  | 5.34122200 |
| H  | 5.35288100  | 8.37684100  | 4.37409000 |
| H  | 5.58777400  | 9.40071200  | 5.82462600 |
| C  | 5.49654700  | 7.22839000  | 6.19120600 |
| H  | 5.96080500  | 7.31494000  | 7.19690800 |
| H  | 4.40223900  | 7.27522200  | 6.36536600 |
| C  | 8.14539700  | 9.05171200  | 6.15501800 |
| H  | 7.59406500  | 8.94890500  | 7.10480600 |
| H  | 8.28868200  | 10.13664300 | 5.95449100 |
| C  | 9.47087100  | 8.28935600  | 6.27318700 |
| H  | 9.99384900  | 8.31739300  | 5.28819300 |
| H  | 10.14680100 | 8.83315200  | 6.96099400 |
| C  | 7.66463300  | 9.04186800  | 3.74713100 |
| H  | 8.71690100  | 9.37357400  | 3.77922500 |
| H  | 7.03231100  | 9.94182000  | 3.57589900 |

|   |            |            |             |
|---|------------|------------|-------------|
| C | 7.51397400 | 8.00833200 | 2.62933000  |
| H | 6.44490200 | 7.72998800 | 2.51945000  |
| H | 7.78907800 | 8.50205800 | 1.67578200  |
| C | 3.42607300 | 5.42687800 | 3.77358200  |
| H | 2.74844400 | 4.56075100 | 3.60835200  |
| C | 4.19330300 | 5.66316100 | 2.45722400  |
| H | 3.49760700 | 5.86083300 | 1.61657900  |
| H | 4.82517700 | 4.80436700 | 2.16898800  |
| H | 4.86075300 | 6.54063900 | 2.54211500  |
| C | 2.52676300 | 6.64522100 | 4.08382200  |
| H | 3.12183500 | 7.56291000 | 4.25493800  |
| H | 1.88935000 | 6.48997300 | 4.97288700  |
| H | 1.85104100 | 6.86030800 | 3.23096700  |
| C | 3.39699700 | 4.75800700 | 6.77615000  |
| H | 2.92481300 | 5.76395900 | 6.80543300  |
| C | 4.08527300 | 4.55802600 | 8.14348800  |
| H | 3.34982700 | 4.65987500 | 8.96745900  |
| H | 4.88547400 | 5.29843300 | 8.31731800  |
| H | 4.54055600 | 3.55620000 | 8.23436000  |
| C | 2.23971600 | 3.74491300 | 6.59340000  |
| H | 2.60567600 | 2.70166700 | 6.58150800  |
| H | 1.67263100 | 3.90897200 | 5.65843500  |
| H | 1.51825700 | 3.82281800 | 7.43201300  |
| C | 5.29513500 | 3.10216200 | 4.75483400  |
| H | 6.25295600 | 3.30436800 | 4.22305000  |
| C | 4.40984600 | 2.27758800 | 3.78807500  |
| H | 4.89867800 | 1.31009900 | 3.55885700  |
| H | 4.22677900 | 2.78757400 | 2.82615300  |
| H | 3.42509100 | 2.04467800 | 4.23538800  |
| C | 5.64920100 | 2.23310200 | 5.98512900  |
| H | 4.73599700 | 1.90333000 | 6.51483700  |
| H | 6.29581400 | 2.75895900 | 6.70721600  |
| H | 6.19612700 | 1.32413400 | 5.66838500  |
| C | 9.26493100 | 4.73073100 | 8.82958400  |
| H | 9.68455800 | 4.03994500 | 8.06955700  |
| C | 7.73298500 | 4.56942700 | 8.77230500  |
| H | 7.44640800 | 3.50731600 | 8.90420700  |
| H | 7.30464200 | 4.90144600 | 7.80667600  |
| H | 7.22694200 | 5.14839200 | 9.56584600  |
| C | 9.80276400 | 4.27855900 | 10.20808300 |
| H | 9.38576100 | 4.88954200 | 11.03125800 |

|   |             |            |             |
|---|-------------|------------|-------------|
| H | 10.90492900 | 4.33578800 | 10.27340900 |
| H | 9.51600500  | 3.22701000 | 10.40849800 |
| C | 9.48854300  | 7.86893900 | 9.56148100  |
| H | 9.64227100  | 8.81878100 | 9.00439200  |
| C | 10.42477700 | 7.92996700 | 10.79282900 |
| H | 10.13913600 | 8.77037900 | 11.45777600 |
| H | 11.48264100 | 8.07844400 | 10.51270300 |
| H | 10.36793500 | 7.00563200 | 11.39657000 |
| C | 8.01413400  | 7.85558100 | 10.02787000 |
| H | 7.81874500  | 7.00887100 | 10.71180400 |
| H | 7.30207900  | 7.76755100 | 9.18631200  |
| H | 7.76591900  | 8.78264200 | 10.58357200 |
| C | 11.85703300 | 6.33655900 | 8.21949700  |
| H | 12.15937800 | 6.20801200 | 9.28231700  |
| C | 12.55346500 | 7.61600000 | 7.70010700  |
| H | 13.65405100 | 7.53535700 | 7.80806600  |
| H | 12.23780600 | 8.52832800 | 8.24131200  |
| H | 12.34868300 | 7.77418100 | 6.62448500  |
| C | 12.37186600 | 5.10455500 | 7.44271200  |
| H | 12.05648600 | 5.12958400 | 6.38371600  |
| H | 12.00607700 | 4.15269300 | 7.86653200  |
| H | 13.48042500 | 5.06945800 | 7.45725800  |
| C | 8.39707300  | 5.12049300 | 0.37641900  |
| H | 9.13573600  | 4.75613900 | -0.37018400 |
| C | 7.81319700  | 3.88634900 | 1.09707500  |
| H | 7.07737800  | 4.18964300 | 1.86715300  |
| H | 8.58466500  | 3.27952900 | 1.60463200  |
| H | 7.28262400  | 3.22317700 | 0.38417700  |
| C | 7.28659300  | 5.87043000 | -0.39466900 |
| H | 6.75788200  | 5.18629800 | -1.08887400 |
| H | 7.68110800  | 6.70817000 | -0.99916900 |
| H | 6.52479800  | 6.28269600 | 0.29399800  |
| C | 10.03471000 | 7.76295100 | 0.54567500  |
| H | 9.12008800  | 8.22713000 | 0.11770500  |
| C | 10.76904200 | 8.86006500 | 1.34822800  |
| H | 11.73159500 | 8.49360600 | 1.74757600  |
| H | 10.17792400 | 9.22480500 | 2.20717200  |
| H | 10.99402400 | 9.73522200 | 0.70532500  |
| C | 10.90027800 | 7.32022200 | -0.65868400 |
| H | 11.14655500 | 8.18957100 | -1.30136800 |
| H | 10.39200600 | 6.57394900 | -1.29547000 |

|   |             |            |             |
|---|-------------|------------|-------------|
| H | 11.85932800 | 6.88019200 | -0.32933800 |
| C | 10.79583300 | 5.20136600 | 2.37227800  |
| H | 10.25622300 | 4.49536700 | 3.04212400  |
| C | 11.58164000 | 4.30895400 | 1.38087200  |
| H | 12.21089900 | 4.90617600 | 0.69471300  |
| H | 10.92012500 | 3.67580000 | 0.76323900  |
| H | 12.25911600 | 3.63015300 | 1.93556500  |
| C | 11.78202600 | 5.98886500 | 3.26574200  |
| H | 12.41104400 | 5.29306400 | 3.85434500  |
| H | 11.27346100 | 6.65971300 | 3.98600900  |
| H | 12.46466000 | 6.61664900 | 2.66297800  |

117

Pu(TREN<sup>TIPS</sup>)F

|    |             |             |            |
|----|-------------|-------------|------------|
| Pu | 7.98147700  | 6.02369100  | 5.14749700 |
| F  | 8.60291600  | 4.00519800  | 5.22517200 |
| Si | 4.46303600  | 4.94616100  | 5.27755700 |
| Si | 10.02408600 | 6.64848500  | 8.16377200 |
| Si | 9.41937100  | 5.94642800  | 1.76993900 |
| N  | 7.27455000  | 8.53800600  | 4.98431600 |
| N  | 5.73946200  | 6.17141200  | 5.50537000 |
| N  | 9.13653000  | 7.23097300  | 6.72571400 |
| N  | 8.42687600  | 6.74431500  | 3.03016300 |
| C  | 5.78485100  | 8.58419300  | 5.00342900 |
| H  | 5.42295800  | 8.38685900  | 3.97967000 |
| H  | 5.43746400  | 9.60078000  | 5.29825000 |
| C  | 5.23613200  | 7.49564100  | 5.93334700 |
| H  | 5.53334600  | 7.70919600  | 6.98326000 |
| H  | 4.12925900  | 7.57480500  | 5.92417600 |
| C  | 7.84061300  | 9.26265000  | 6.15546200 |
| H  | 7.15288600  | 9.11690800  | 7.00565400 |
| H  | 7.88846900  | 10.35517700 | 5.94341000 |
| C  | 9.21026300  | 8.69645500  | 6.54089100 |
| H  | 9.96232000  | 8.95693400  | 5.76296900 |
| H  | 9.53463800  | 9.24253300  | 7.45270700 |
| C  | 7.83086400  | 9.05910900  | 3.70550800 |
| H  | 8.88836900  | 9.32054800  | 3.88408400 |
| H  | 7.29780700  | 9.99054400  | 3.40652100 |
| C  | 7.76968200  | 7.99766300  | 2.60113000 |
| H  | 6.70984000  | 7.80817900  | 2.32290500 |

|   |             |            |             |
|---|-------------|------------|-------------|
| H | 8.23108600  | 8.45206400 | 1.69881800  |
| C | 3.20363200  | 5.43067700 | 3.87195600  |
| H | 2.63138000  | 4.48998700 | 3.71538600  |
| C | 3.89866500  | 5.76962900 | 2.53585100  |
| H | 3.15941200  | 5.89362000 | 1.71847500  |
| H | 4.61383100  | 4.98945600 | 2.21888200  |
| H | 4.46568200  | 6.71701800 | 2.61097500  |
| C | 2.16384000  | 6.52326700 | 4.21321800  |
| H | 2.63271100  | 7.52110500 | 4.30792500  |
| H | 1.61768100  | 6.31909500 | 5.15203900  |
| H | 1.40755300  | 6.60578000 | 3.40595000  |
| C | 3.41162500  | 4.81341100 | 6.90241700  |
| H | 2.88548500  | 5.79192700 | 6.95515000  |
| C | 4.23295200  | 4.68646700 | 8.20409200  |
| H | 3.57723700  | 4.78664100 | 9.09302300  |
| H | 5.01509200  | 5.46380100 | 8.27541600  |
| H | 4.73479500  | 3.70542900 | 8.27902300  |
| C | 2.31901600  | 3.72152500 | 6.82617600  |
| H | 2.75893100  | 2.70713400 | 6.79360300  |
| H | 1.67397200  | 3.83194000 | 5.93489900  |
| H | 1.65951400  | 3.75879800 | 7.71706100  |
| C | 5.31213700  | 3.28571300 | 4.76601100  |
| H | 6.19174700  | 3.57838800 | 4.15087700  |
| C | 4.43085500  | 2.37342900 | 3.87838400  |
| H | 4.98411400  | 1.45125700 | 3.61058800  |
| H | 4.12633300  | 2.85770000 | 2.93430800  |
| H | 3.51037400  | 2.05711400 | 4.40482400  |
| C | 5.85157300  | 2.46683400 | 5.96284700  |
| H | 5.02113400  | 2.06383700 | 6.57223200  |
| H | 6.50646500  | 3.05671300 | 6.62486700  |
| H | 6.44771500  | 1.60560200 | 5.60310400  |
| C | 9.85169200  | 4.72682000 | 8.22536300  |
| H | 9.98622200  | 4.38908000 | 7.17657400  |
| C | 8.45462100  | 4.23742100 | 8.67387200  |
| H | 8.35544900  | 3.14549300 | 8.51701700  |
| H | 7.62692500  | 4.72165700 | 8.12107300  |
| H | 8.28387400  | 4.43260000 | 9.74944800  |
| C | 10.94348700 | 4.01690100 | 9.06261100  |
| H | 10.90262100 | 4.30664200 | 10.12937900 |
| H | 11.96392400 | 4.23194900 | 8.69811500  |
| H | 10.80499400 | 2.91800800 | 9.01886000  |

|   |             |            |             |
|---|-------------|------------|-------------|
| C | 9.32615900  | 7.54925700 | 9.73618700  |
| H | 9.62474600  | 8.61105300 | 9.59359000  |
| C | 9.98508700  | 7.07735100 | 11.05385300 |
| H | 9.64924300  | 7.69934100 | 11.90852900 |
| H | 11.08893100 | 7.13279400 | 11.02136600 |
| H | 9.71121900  | 6.03182300 | 11.28957900 |
| C | 7.78701600  | 7.53478100 | 9.86693300  |
| H | 7.40812600  | 6.52912300 | 10.12351000 |
| H | 7.28992100  | 7.83980200 | 8.92819700  |
| H | 7.45147600  | 8.22353800 | 10.66882500 |
| C | 11.91775400 | 7.07085000 | 8.09841500  |
| H | 12.34002900 | 6.50823700 | 8.95973200  |
| C | 12.28770400 | 8.55672200 | 8.31143900  |
| H | 13.38813200 | 8.67818600 | 8.37770800  |
| H | 11.85663000 | 8.97495700 | 9.23941500  |
| H | 11.94740700 | 9.18709200 | 7.46853100  |
| C | 12.59565600 | 6.53583800 | 6.81902800  |
| H | 12.22846200 | 7.06933400 | 5.92247900  |
| H | 12.40841700 | 5.45853400 | 6.65808900  |
| H | 13.69471800 | 6.67891200 | 6.85984200  |
| C | 8.34977700  | 5.18329700 | 0.34676200  |
| H | 9.09154100  | 4.72207500 | -0.34173400 |
| C | 7.42467900  | 4.05627000 | 0.85412400  |
| H | 6.68172600  | 4.44787300 | 1.57397600  |
| H | 7.98135700  | 3.24892200 | 1.36337500  |
| H | 6.86054800  | 3.59495300 | 0.01827900  |
| C | 7.54310500  | 6.21220100 | -0.47730000 |
| H | 7.03065000  | 5.72064700 | -1.32927200 |
| H | 8.18086200  | 7.01213300 | -0.89767100 |
| H | 6.75783900  | 6.69524100 | 0.13388200  |
| C | 10.56428400 | 7.28630300 | 0.94978600  |
| H | 9.85913500  | 7.96967900 | 0.42797800  |
| C | 11.36288300 | 8.14431100 | 1.95618000  |
| H | 12.14984300 | 7.55168100 | 2.45719400  |
| H | 10.71894600 | 8.56443900 | 2.74969500  |
| H | 11.86670300 | 8.98994300 | 1.44513900  |
| C | 11.50789600 | 6.72175700 | -0.13782200 |
| H | 12.02085200 | 7.54428000 | -0.67666000 |
| H | 10.97319700 | 6.11688400 | -0.89264800 |
| H | 12.29810900 | 6.08526200 | 0.30239100  |
| C | 10.37866400 | 4.48719800 | 2.58754500  |

|   |             |            |            |
|---|-------------|------------|------------|
| H | 9.59894000  | 3.90777500 | 3.12375200 |
| C | 11.04169300 | 3.51874100 | 1.57906600 |
| H | 11.84104100 | 4.01217900 | 0.99615900 |
| H | 10.32094200 | 3.09218800 | 0.85850900 |
| H | 11.50814700 | 2.66849600 | 2.11598100 |
| C | 11.41181900 | 4.92660500 | 3.64775900 |
| H | 11.76783200 | 4.05620400 | 4.23300400 |
| H | 11.00341700 | 5.65896100 | 4.36977000 |
| H | 12.29852800 | 5.39540800 | 3.18069100 |

117

Pu(TREN<sup>TIPS</sup>)Cl

|    |            |             |            |
|----|------------|-------------|------------|
| Pu | 8.03965000 | 5.93199000  | 5.14162100 |
| Cl | 8.95424200 | 3.46553900  | 5.15229000 |
| Si | 4.49110000 | 4.84179300  | 5.23645600 |
| Si | 9.94396100 | 6.47129900  | 8.26900700 |
| Si | 9.52935600 | 6.17270800  | 1.76757200 |
| N  | 7.27598100 | 8.45847600  | 5.10761200 |
| N  | 5.81147300 | 6.01495400  | 5.56658200 |
| N  | 9.13378900 | 7.07777700  | 6.78489400 |
| N  | 8.47983600 | 6.81583200  | 3.08038900 |
| C  | 5.79042100 | 8.46203300  | 5.22566100 |
| H  | 5.36806400 | 8.31957800  | 4.21569600 |
| H  | 5.43749900 | 9.44746100  | 5.60598000 |
| C  | 5.32936700 | 7.30526600  | 6.11782900 |
| H  | 5.70972900 | 7.45300300  | 7.15160400 |
| H  | 4.22489600 | 7.36304900  | 6.19988200 |
| C  | 7.91514500 | 9.14994300  | 6.26175600 |
| H  | 7.27887900 | 8.99886800  | 7.15024100 |
| H  | 7.97702600 | 10.24452000 | 6.06847700 |
| C  | 9.28685800 | 8.53036400  | 6.53665900 |
| H  | 9.96104500 | 8.71392800  | 5.67199200 |
| H  | 9.74262000 | 9.08098200  | 7.38435800 |
| C  | 7.72549700 | 9.04980800  | 3.81719400 |
| H  | 8.77165200 | 9.37790100  | 3.94516600 |
| H  | 7.11541000 | 9.94842600  | 3.57114200 |
| C  | 7.67776400 | 8.00300900  | 2.70347200 |
| H  | 6.62172100 | 7.72029700  | 2.50039900 |
| H  | 8.02774800 | 8.49308000  | 1.77336800 |
| C  | 3.39609800 | 5.40296900  | 3.73061800 |



|   |             |            |             |
|---|-------------|------------|-------------|
| H | 2.74199900  | 4.52407800 | 3.53912500  |
| C | 4.22807500  | 5.64291900 | 2.45376900  |
| H | 3.57553500  | 5.84905700 | 1.58112900  |
| H | 4.86818200  | 4.78158600 | 2.19139000  |
| H | 4.89607600  | 6.51605600 | 2.57826500  |
| C | 2.46136300  | 6.60752800 | 3.98439800  |
| H | 3.03012400  | 7.54128700 | 4.15662600  |
| H | 1.79598700  | 6.45611600 | 4.85354200  |
| H | 1.81267800  | 6.78968900 | 3.10344000  |
| C | 3.28749100  | 4.78587600 | 6.75763800  |
| H | 2.79650500  | 5.78317600 | 6.75204300  |
| C | 3.95989400  | 4.63206900 | 8.13934000  |
| H | 3.21050500  | 4.73489200 | 8.95051300  |
| H | 4.74181400  | 5.39338200 | 8.30933300  |
| H | 4.43498200  | 3.64218100 | 8.25743700  |
| C | 2.15810300  | 3.74215000 | 6.57859900  |
| H | 2.54968700  | 2.70829600 | 6.60259100  |
| H | 1.60914200  | 3.86817300 | 5.62696500  |
| H | 1.41624200  | 3.82455300 | 7.39875300  |
| C | 5.27109600  | 3.12794300 | 4.81250200  |
| H | 6.21870700  | 3.34820500 | 4.27342300  |
| C | 4.40836800  | 2.25898900 | 3.86522400  |
| H | 4.92528800  | 1.30300100 | 3.64954200  |
| H | 4.20869300  | 2.74931100 | 2.89652400  |
| H | 3.43193600  | 2.00447200 | 4.31885200  |
| C | 5.65902800  | 2.29915400 | 6.06029300  |
| H | 4.76008500  | 1.93366100 | 6.59197400  |
| H | 6.27108500  | 2.87065100 | 6.77768800  |
| H | 6.25180400  | 1.41252800 | 5.76337300  |
| C | 9.31391100  | 4.68542900 | 8.60774500  |
| H | 9.58780100  | 4.12703400 | 7.68842900  |
| C | 7.78428600  | 4.55464400 | 8.76890400  |
| H | 7.48383400  | 3.48858300 | 8.78915600  |
| H | 7.22101500  | 5.03665300 | 7.94579300  |
| H | 7.43006000  | 5.01202000 | 9.71094400  |
| C | 10.03086800 | 3.98616900 | 9.78721200  |
| H | 9.75248100  | 4.43532500 | 10.75888400 |
| H | 11.13215200 | 4.02705900 | 9.70385200  |
| H | 9.74445900  | 2.91655200 | 9.83144700  |
| C | 9.62642000  | 7.71758400 | 9.72999000  |
| H | 9.97000000  | 8.69949500 | 9.33945700  |

|   |             |            |             |
|---|-------------|------------|-------------|
| C | 10.48162500 | 7.43598200 | 10.98794900 |
| H | 10.34505000 | 8.23965000 | 11.73986800 |
| H | 11.56099300 | 7.37949300 | 10.75916300 |
| H | 10.19393100 | 6.48649000 | 11.47456900 |
| C | 8.14043900  | 7.88419000 | 10.11901900 |
| H | 7.75822400  | 6.98608400 | 10.63770000 |
| H | 7.49177500  | 8.05550700 | 9.24031100  |
| H | 8.00384200  | 8.74024400 | 10.81060200 |
| C | 11.86158700 | 6.36963800 | 8.02977600  |
| H | 12.25647700 | 6.02667600 | 9.01103900  |
| C | 12.52232600 | 7.73154400 | 7.71692800  |
| H | 13.62558200 | 7.63157900 | 7.66846500  |
| H | 12.29693200 | 8.50200100 | 8.47830600  |
| H | 12.19192900 | 8.12233000 | 6.73606800  |
| C | 12.26624900 | 5.31929900 | 6.97344100  |
| H | 11.83969200 | 5.56091500 | 5.98275400  |
| H | 11.92640400 | 4.30161100 | 7.23538500  |
| H | 13.36859800 | 5.28181900 | 6.85640600  |
| C | 8.52033900  | 4.99331500 | 0.61237500  |
| H | 9.25919800  | 4.55686000 | -0.09468000 |
| C | 7.88850200  | 3.82878100 | 1.40474500  |
| H | 7.15396100  | 4.20518100 | 2.14317500  |
| H | 8.63262600  | 3.23841500 | 1.96787700  |
| H | 7.34669100  | 3.13451400 | 0.73053600  |
| C | 7.44335400  | 5.71885600 | -0.22537800 |
| H | 6.89626200  | 5.00121000 | -0.87013300 |
| H | 7.87073900  | 6.49343600 | -0.88833100 |
| H | 6.69115800  | 6.20821400 | 0.42207200  |
| C | 10.16093100 | 7.62838500 | 0.64074500  |
| H | 9.24424400  | 8.01272200 | 0.14348200  |
| C | 10.82041300 | 8.82548600 | 1.36318400  |
| H | 11.80280500 | 8.55385900 | 1.78754100  |
| H | 10.20487700 | 9.21375600 | 2.19423000  |
| H | 10.99109400 | 9.66306700 | 0.65644900  |
| C | 11.08518400 | 7.11987900 | -0.49258600 |
| H | 11.32186700 | 7.93900900 | -1.20172300 |
| H | 10.62790200 | 6.30074700 | -1.07664800 |
| H | 12.04819300 | 6.74886200 | -0.09575300 |
| C | 10.98024200 | 5.17558400 | 2.55519600  |
| H | 10.53177300 | 4.63154400 | 3.41259800  |
| C | 11.58391200 | 4.09417200 | 1.62564800  |

|   |             |            |            |
|---|-------------|------------|------------|
| H | 12.04672200 | 4.53299700 | 0.72155700 |
| H | 10.83424400 | 3.35505100 | 1.29322800 |
| H | 12.37851100 | 3.53443400 | 2.15846600 |
| C | 12.11096300 | 6.06976200 | 3.11574600 |
| H | 12.83427200 | 5.46412900 | 3.69641700 |
| H | 11.73248800 | 6.86657300 | 3.78220300 |
| H | 12.68048900 | 6.55797100 | 2.30269300 |

117

Pu(TREN<sup>TIPS</sup>)Br

|    |            |             |            |
|----|------------|-------------|------------|
| Pu | 8.04181800 | 5.91591100  | 5.14057000 |
| Br | 9.02385800 | 3.29682600  | 5.15316100 |
| Si | 4.48573200 | 4.83944500  | 5.24197700 |
| Si | 9.94247300 | 6.45967700  | 8.26924600 |
| Si | 9.53753400 | 6.18075700  | 1.76844600 |
| N  | 7.27966400 | 8.44538600  | 5.11100600 |
| N  | 5.81722900 | 6.00201600  | 5.57552600 |
| N  | 9.13586600 | 7.06160000  | 6.77927700 |
| N  | 8.47786600 | 6.80697100  | 3.08308100 |
| C  | 5.79504000 | 8.44944200  | 5.23905300 |
| H  | 5.36617400 | 8.30802800  | 4.23173400 |
| H  | 5.44479500 | 9.43452100  | 5.62253700 |
| C  | 5.33975000 | 7.29204000  | 6.13259200 |
| H  | 5.72766100 | 7.43739300  | 7.16374200 |
| H  | 4.23598400 | 7.35026400  | 6.22211700 |
| C  | 7.92692400 | 9.13759200  | 6.26008600 |
| H  | 7.29604200 | 8.99000400  | 7.15296900 |
| H  | 7.99112800 | 10.23149600 | 6.06438900 |
| C  | 9.29753200 | 8.51247600  | 6.52554700 |
| H  | 9.96481300 | 8.68840500  | 5.65409000 |
| H  | 9.76422900 | 9.06261000  | 7.36739000 |
| C  | 7.71872300 | 9.03823000  | 3.81769700 |
| H  | 8.76437600 | 9.37048000  | 3.93846600 |
| H  | 7.10358900 | 9.93419900  | 3.57484300 |
| C  | 7.66733400 | 7.98899800  | 2.70719700 |
| H  | 6.61131200 | 7.70053200  | 2.51356100 |
| H  | 8.00789900 | 8.47660600  | 1.77263500 |
| C  | 3.40271000 | 5.40738600  | 3.73097100 |
| H  | 2.74015600 | 4.53439100  | 3.54147700 |
| C  | 4.24142300 | 5.63185900  | 2.45577200 |

|   |             |            |             |
|---|-------------|------------|-------------|
| H | 3.59392900  | 5.83623800 | 1.57899200  |
| H | 4.87663500  | 4.76419300 | 2.20223700  |
| H | 4.91476300  | 6.50124400 | 2.57645900  |
| C | 2.47974900  | 6.62251700 | 3.97677200  |
| H | 3.05729300  | 7.55066500 | 4.15023500  |
| H | 1.80817500  | 6.47996300 | 4.84264700  |
| H | 1.83782800  | 6.80956300 | 3.09192600  |
| C | 3.27605700  | 4.79943200 | 6.75900500  |
| H | 2.79268600  | 5.80030300 | 6.74935800  |
| C | 3.94191900  | 4.64293800 | 8.14356100  |
| H | 3.19069900  | 4.75502900 | 8.95177000  |
| H | 4.73057500  | 5.39709000 | 8.31439700  |
| H | 4.40712000  | 3.64892200 | 8.26555700  |
| C | 2.13887200  | 3.76446600 | 6.57750300  |
| H | 2.52162100  | 2.72742800 | 6.60508400  |
| H | 1.59466500  | 3.89316400 | 5.62349700  |
| H | 1.39456700  | 3.85483400 | 7.39457300  |
| C | 5.24810800  | 3.11726600 | 4.82476500  |
| H | 6.20163600  | 3.32692400 | 4.29125300  |
| C | 4.38310700  | 2.25550100 | 3.87319000  |
| H | 4.89038900  | 1.29250500 | 3.66618100  |
| H | 4.19869800  | 2.74431700 | 2.90067600  |
| H | 3.39939800  | 2.01477000 | 4.31847900  |
| C | 5.61981100  | 2.28785700 | 6.07693700  |
| H | 4.71401900  | 1.93271800 | 6.60386200  |
| H | 6.23365000  | 2.85538700 | 6.79619000  |
| H | 6.20615300  | 1.39494700 | 5.78630000  |
| C | 9.30341100  | 4.68145000 | 8.62412000  |
| H | 9.58935800  | 4.11154800 | 7.71541300  |
| C | 7.77165800  | 4.55283400 | 8.76394300  |
| H | 7.47055400  | 3.48711000 | 8.78729600  |
| H | 7.21931500  | 5.02929700 | 7.93017500  |
| H | 7.40415600  | 5.01741800 | 9.69735300  |
| C | 10.00368700 | 3.99523900 | 9.82098300  |
| H | 9.71317100  | 4.45435900 | 10.78449800 |
| H | 11.10599600 | 4.03449600 | 9.75110100  |
| H | 9.71595900  | 2.92631800 | 9.87256700  |
| C | 9.63139200  | 7.71674800 | 9.72217500  |
| H | 9.96362000  | 8.69869300 | 9.32248500  |
| C | 10.50134200 | 7.44972400 | 10.97318400 |
| H | 10.36513700 | 8.25658800 | 11.72174300 |

|   |             |            |             |
|---|-------------|------------|-------------|
| H | 11.57875800 | 7.40168800 | 10.73367000 |
| H | 10.22751500 | 6.50053700 | 11.46822100 |
| C | 8.14781800  | 7.87364000 | 10.12421900 |
| H | 7.77711300  | 6.97478000 | 10.64999800 |
| H | 7.48994700  | 8.03668300 | 9.25068600  |
| H | 8.01104100  | 8.73149000 | 10.81351600 |
| C | 11.85813700 | 6.34624200 | 8.02204500  |
| H | 12.25500700 | 6.00351600 | 9.00268900  |
| C | 12.52512600 | 7.70362300 | 7.70306300  |
| H | 13.62778700 | 7.59794500 | 7.65375600  |
| H | 12.30427000 | 8.47815900 | 8.46166000  |
| H | 12.19573900 | 8.09199300 | 6.72094100  |
| C | 12.25122500 | 5.29080400 | 6.96639200  |
| H | 11.81918400 | 5.53085800 | 5.97756400  |
| H | 11.90767100 | 4.27557400 | 7.23266400  |
| H | 13.35268500 | 5.24818900 | 6.84324700  |
| C | 8.54257500  | 4.98685100 | 0.61425000  |
| H | 9.28647100  | 4.56377600 | -0.09571000 |
| C | 7.92670500  | 3.80945400 | 1.39948800  |
| H | 7.19546100  | 4.17004600 | 2.14938300  |
| H | 8.68006900  | 3.21840400 | 1.94905500  |
| H | 7.38454700  | 3.11905600 | 0.72147900  |
| C | 7.45528400  | 5.70103600 | -0.22019100 |
| H | 6.92192900  | 4.97881600 | -0.87128200 |
| H | 7.87072200  | 6.48740200 | -0.87664200 |
| H | 6.69314000  | 6.17264900 | 0.42883700  |
| C | 10.14054700 | 7.64425400 | 0.63497400  |
| H | 9.21669100  | 8.01192200 | 0.13815000  |
| C | 10.78335200 | 8.85637400 | 1.34741600  |
| H | 11.77170300 | 8.60436600 | 1.77016700  |
| H | 10.16452000 | 9.24091600 | 2.17769500  |
| H | 10.93793700 | 9.69172700 | 0.63434000  |
| C | 11.06956300 | 7.14456600 | -0.49838300 |
| H | 11.28616100 | 7.96187500 | -1.21594700 |
| H | 10.62674700 | 6.31075300 | -1.07254800 |
| H | 12.04165800 | 6.79725100 | -0.10247500 |
| C | 11.01273600 | 5.21616700 | 2.55114200  |
| H | 10.58107900 | 4.66575900 | 3.41322600  |
| C | 11.62921600 | 4.14255300 | 1.62148800  |
| H | 12.07821700 | 4.58585600 | 0.71261500  |
| H | 10.88953400 | 3.38981300 | 1.29733300  |

|   |             |            |            |
|---|-------------|------------|------------|
| H | 12.43674900 | 3.59825000 | 2.15077200 |
| C | 12.12874100 | 6.13339900 | 3.10363800 |
| H | 12.86736100 | 5.54237500 | 3.68008300 |
| H | 11.73818200 | 6.92190100 | 3.77317100 |
| H | 12.68306900 | 6.63337100 | 2.28724600 |

117

Pu(TREN<sup>TIPS</sup>)I

|    |             |             |            |
|----|-------------|-------------|------------|
| Pu | 8.11458900  | 5.90330100  | 5.00864200 |
| I  | 9.17507100  | 3.03309100  | 5.21239800 |
| Si | 4.52706600  | 4.79229400  | 5.25344400 |
| Si | 9.94068100  | 6.34275300  | 8.33067000 |
| Si | 9.48303400  | 6.30339600  | 1.62053800 |
| N  | 7.33990100  | 8.39118700  | 5.08242100 |
| N  | 5.88607000  | 5.93881400  | 5.51955800 |
| N  | 9.21989300  | 6.78566800  | 6.75017800 |
| N  | 8.36897300  | 6.83219700  | 2.92595900 |
| C  | 5.87677200  | 8.42382100  | 5.35030200 |
| H  | 5.35873100  | 8.38536600  | 4.37652500 |
| H  | 5.59372900  | 9.37846300  | 5.84793200 |
| C  | 5.46039000  | 7.20330900  | 6.17573800 |
| H  | 5.89953800  | 7.27949500  | 7.19459400 |
| H  | 4.36315300  | 7.26997200  | 6.32536500 |
| C  | 8.15752000  | 8.96607800  | 6.19332800 |
| H  | 7.60292600  | 8.84640700  | 7.13904500 |
| H  | 8.32468300  | 10.05322400 | 6.02634200 |
| C  | 9.47443100  | 8.17645900  | 6.28780700 |
| H  | 9.95887000  | 8.18031300  | 5.28046600 |
| H  | 10.18671800 | 8.72326100  | 6.93558000 |
| C  | 7.67684300  | 9.03242200  | 3.77916600 |
| H  | 8.72919300  | 9.36229800  | 3.82666600 |
| H  | 7.04699500  | 9.93570200  | 3.61846900 |
| C  | 7.53576300  | 8.01796700  | 2.63839100 |
| H  | 6.46811400  | 7.73200400  | 2.52771300 |
| H  | 7.80473500  | 8.53159000  | 1.69293900 |
| C  | 3.43672400  | 5.37491500  | 3.75163800 |
| H  | 2.72804100  | 4.53306600  | 3.59169700 |
| C  | 4.26273600  | 5.53387300  | 2.45936400 |
| H  | 3.61883400  | 5.80802100  | 1.59887700 |
| H  | 4.80394300  | 4.61040800  | 2.18596600 |

|   |             |            |             |
|---|-------------|------------|-------------|
| H | 5.02293800  | 6.32881800 | 2.57283300  |
| C | 2.58300000  | 6.63899800 | 3.99764600  |
| H | 3.21126100  | 7.53632300 | 4.15709000  |
| H | 1.91655100  | 6.53845600 | 4.87350000  |
| H | 1.93975300  | 6.85432600 | 3.11998500  |
| C | 3.32651900  | 4.78713300 | 6.78043200  |
| H | 2.86250500  | 5.79718800 | 6.77342600  |
| C | 3.99786600  | 4.61890000 | 8.16085000  |
| H | 3.25597200  | 4.75048500 | 8.97488700  |
| H | 4.80537900  | 5.35438500 | 8.32310700  |
| H | 4.44150800  | 3.61508100 | 8.28205400  |
| C | 2.16578500  | 3.77652000 | 6.61094800  |
| H | 2.52659900  | 2.73168300 | 6.63853200  |
| H | 1.61745200  | 3.91410300 | 5.66059600  |
| H | 1.42954800  | 3.88487000 | 7.43329500  |
| C | 5.22200600  | 3.04241600 | 4.83381100  |
| H | 6.17115500  | 3.22146900 | 4.28143300  |
| C | 4.31076000  | 2.19847300 | 3.90842200  |
| H | 4.78519000  | 1.21853700 | 3.70214100  |
| H | 4.11870400  | 2.67980900 | 2.93356400  |
| H | 3.33036000  | 1.99087600 | 4.37691300  |
| C | 5.58873100  | 2.20609000 | 6.08276700  |
| H | 4.68226700  | 1.89669500 | 6.63631000  |
| H | 6.25086000  | 2.74675700 | 6.77909000  |
| H | 6.12408300  | 1.28424700 | 5.78320100  |
| C | 9.23507900  | 4.64703500 | 8.88751200  |
| H | 9.62504900  | 3.93390300 | 8.13201300  |
| C | 7.69715300  | 4.53866200 | 8.84677800  |
| H | 7.37555300  | 3.49226800 | 9.01784200  |
| H | 7.27694700  | 4.85196100 | 7.87219200  |
| H | 7.21848300  | 5.16077400 | 9.62451300  |
| C | 9.77311600  | 4.19569500 | 10.26643500 |
| H | 9.38629900  | 4.83129700 | 11.08571600 |
| H | 10.87745300 | 4.21532500 | 10.31937500 |
| H | 9.45280100  | 3.15748900 | 10.48443300 |
| C | 9.57671000  | 7.78594000 | 9.58731900  |
| H | 9.75374700  | 8.72044900 | 9.01118600  |
| C | 10.53699200 | 7.83204400 | 10.80065300 |
| H | 10.29355300 | 8.69294700 | 11.45599600 |
| H | 11.59463500 | 7.93710200 | 10.50015400 |
| H | 10.45674200 | 6.92024300 | 11.42054500 |

|   |             |            |             |
|---|-------------|------------|-------------|
| C | 8.11127000  | 7.83147200 | 10.08014700 |
| H | 7.89857400  | 7.00169400 | 10.77966500 |
| H | 7.38010400  | 7.75723100 | 9.25379100  |
| H | 7.90736900  | 8.77424900 | 10.62739100 |
| C | 11.86559700 | 6.17247400 | 8.19634500  |
| H | 12.19698000 | 6.02105200 | 9.24702700  |
| C | 12.57860900 | 7.43782900 | 7.66686300  |
| H | 13.67931200 | 7.33163200 | 7.74739400  |
| H | 12.29653000 | 8.35424600 | 8.21942400  |
| H | 12.35168000 | 7.60448300 | 6.59704100  |
| C | 12.30915700 | 4.93576300 | 7.38423400  |
| H | 11.94565900 | 4.98307300 | 6.34091500  |
| H | 11.93192600 | 3.99042100 | 7.81292600  |
| H | 13.41558400 | 4.86653500 | 7.34954000  |
| C | 8.55052700  | 5.10030500 | 0.42509900  |
| H | 9.32398400  | 4.72206800 | -0.27867300 |
| C | 7.96198300  | 3.88656100 | 1.17482600  |
| H | 7.18004200  | 4.20649700 | 1.88983500  |
| H | 8.71836100  | 3.32602800 | 1.75297100  |
| H | 7.48715400  | 3.17624500 | 0.46799800  |
| C | 7.45422900  | 5.79688500 | -0.41223100 |
| H | 6.96694900  | 5.07455400 | -1.09801100 |
| H | 7.85115000  | 6.62044100 | -1.03383000 |
| H | 6.65764400  | 6.21373100 | 0.23313900  |
| C | 10.07447100 | 7.81050400 | 0.54467200  |
| H | 9.14932700  | 8.19600500 | 0.06354600  |
| C | 10.71235100 | 8.99251600 | 1.30930500  |
| H | 11.68652000 | 8.71495100 | 1.74878600  |
| H | 10.07550100 | 9.36118300 | 2.13321400  |
| H | 10.89435300 | 9.84719400 | 0.62646700  |
| C | 11.00960700 | 7.36010800 | -0.60392300 |
| H | 11.23838900 | 8.21024000 | -1.27796600 |
| H | 10.56513200 | 6.55982700 | -1.22253900 |
| H | 11.97542900 | 6.98579000 | -0.21709700 |
| C | 10.93090900 | 5.35473100 | 2.46520200  |
| H | 10.44274200 | 4.74247800 | 3.25718600  |
| C | 11.65642200 | 4.34433400 | 1.54516600  |
| H | 12.18620000 | 4.84715500 | 0.71406700  |
| H | 10.96390000 | 3.60668300 | 1.10386700  |
| H | 12.41437600 | 3.77704600 | 2.12057200  |
| C | 11.96357200 | 6.26369600 | 3.17067300  |



|   |             |            |            |
|---|-------------|------------|------------|
| H | 12.63139400 | 5.66439800 | 3.81983200 |
| H | 11.49035700 | 7.03638600 | 3.80594700 |
| H | 12.60715200 | 6.78660000 | 2.43868300 |
